1 **Wnt- and Glutamate-receptors orchestrate stem cell dynamics and asymmetric cell**  
2 **division**

3  
4 Sergi Junyent<sup>\*,1</sup>, Joshua Reeves<sup>\*,1</sup>, James L. A. Szczerkowski<sup>1</sup>, Clare L. Garcin<sup>1</sup>, Tung-Jui  
5 Trieu<sup>1</sup>, Matthew Wilson<sup>1</sup> and Shukry J. Habib<sup>#,1</sup>

6  
7 \*These authors contributed equally

8 #Correspondence to: shukry.habib@kcl.ac.uk

9 <sup>1</sup>Centre for Stem Cells and Regenerative Medicine, King's College London. 28<sup>th</sup> Floor, Tower  
10 Wing, Guy's Campus, Great Maze Pond, SE1 9RT. London, United Kingdom.

11  
12  
13 **ABSTRACT**

14 Wnt signalling regulates many aspects of cell biology. Wnt-pathway activation and its  
15 downstream effects have been extensively studied, but the dynamic analysis of Wnt-ligands  
16 on mammalian cellular membranes is obstructed by difficulties of visualization. We overcome  
17 this using microbead-tethered Wnts presented to single embryonic stem cells, which undergo  
18 Wnt-mediated asymmetric cell division (ACD). Through live imaging and genetic editing, we  
19 show that knockout of Wnt co-receptor Lrp5 promotes cytoneme formation and Wnt-  
20 recruitment, which requires Lrp6 and  $\beta$ -catenin. Lrp5 facilitates ligand-retention at the  
21 membrane, and alongside Lrp6 mediates Wnt-ligand stabilization and positioning.  $\beta$ -catenin  
22 or Wnt co-receptor knockout causes misorientation at mitosis, and all but Lrp5 are required  
23 for Wnt-orientated ACD. Surprisingly, ionotropic glutamate receptor (iGluR) activity enables  
24 initial Wnt-recruitment, positioning, and ultimately oriented ACD. Uniquely, we have  
25 scrutinized the early Wnt ligand-membrane interaction, linking roles of Wnt-pathway  
26 components and crosstalk with iGluRs in guiding cell fate determination by oriented ACD.

27

## 1 INTRODUCTION

2 Wnt signalling is an ancient pathway that accompanied the evolution of metazoans and plays  
3 major roles in cell biology, development, tissue homeostasis and disease (Clevers, 2006;  
4 Garcin and Habib, 2017). This pathway is regulated by Wnt ligands, which are palmitoylated  
5 in the endoplasmic reticulum (Takada et al., 2006). The lipid moiety is crucial for Wnt secretion  
6 and renders the protein hydrophobic (Willert et al., 2003). Consequently, Wnts are often  
7 secreted locally by producing cells (Langton et al., 2016; Mills et al., 2017). Wnt ligand binding  
8 to the receptor Frizzled (Fzd) and the co-receptors Low-density lipoprotein receptor-related  
9 protein 5 and 6 (Lrp5 and Lrp6) leads to the initiation of a signalling cascade that results in the  
10 stabilization of  $\beta$ -catenin, its nuclear translocation and the transcription of Wnt/ $\beta$ -catenin target  
11 genes (Nusse and Clevers, 2017).

12 Concomitantly, Wnt signalling can control the morpho-kinetics of the receiving cells, often  
13 involving a crosstalk with  $\beta$ -catenin independent signalling cascades (James et al., 2008;  
14 Komiya and Habas, 2008). As a result, Wnt reception can initiate a complex signalling program  
15 that coordinates cell cycle progression (Niehrs and Acebron, 2012), cytoskeleton arrangement  
16 (Salinas, 2007; Stamatakou et al., 2015), cell migration (Sedgwick and D'Souza-Schorey,  
17 2016) and cell polarization (Goldstein et al., 2006; Stanganello et al., 2019). In stem cells,  
18 localized Wnt activity controls cell fate by inducing self-renewal and blocking differentiation  
19 (Clevers et al., 2014; Garcin and Habib, 2017).

20 Components of the Wnt signalling pathway modulate many aspects of the mitotic program,  
21 including microtubule dynamics, spindle formation and centrosome division (Niehrs and  
22 Acebron, 2012). Lrp6 is phosphorylated at G2-M, which enhances Wnt signalling in a cell  
23 cycle-dependent manner (Davidson et al., 2009), and Fzd and Lrp6 establish spindle  
24 orientation and promote mitotic progression in HeLaS3 cell line (Kikuchi et al., 2010).  $\beta$ -catenin  
25 accumulates at the centrosomes, and regulates radial microtubules and centrosome splitting  
26 (Bahmanyar et al., 2008; Huang et al., 2007). These reports and others (Akong et al., 2002;  
27 Bienz, 2005; Hendriksen et al., 2008; McCartney et al., 1999; Mizumoto and Sawa, 2007;  
28 Tahinci et al., 2007) suggest a role for the intrinsic Wnt pathway components in the regulation  
29 of cell polarization and cell division. *In vivo* studies in non-mammalian systems (*C. elegans*,  
30 *Drosophila* and *Xenopus*) have also demonstrated that localized Wnt reception influences cell  
31 fate by inducing oriented asymmetric cell division (ACD) (Bertrand, 2016; Goldstein et al.,  
32 2006; Huang and Niehrs, 2014; Kaur et al., 2020; Sugioka et al., 2011; Walston et al., 2004).

33 In these systems, the coordinated effects of Wnt activation arise from the interaction between  
34 localized Wnt ligands and Wnt pathway components at the cell membrane. However, our  
35 understanding of localized Wnt recognition in mammalian cells remains elusive. Insights into

1 Wnt ligand-receptor interaction so far has been restricted to genetic and/or biochemical  
2 analysis, or transcription of target genes (Mills et al., 2017). *In vitro* studies have often relied  
3 on the addition of solubilized Wnt ligands to the media, which does not recapitulate the  
4 localized presentation of Wnt often observed *in vivo* (Garcin and Habib, 2017; Mills et al.,  
5 2017). Moreover, direct tagging and visualization of mammalian Wnt proteins has proven  
6 difficult (Willert and Nusse, 2012), which complicates the study of the effects of Wnt at the  
7 single cell level. As a result, the molecular events that control Wnt reception and kinetics in  
8 the cell remain elusive.

9 To overcome these issues, we previously developed a system of localized Wnt presentation  
10 to study Wnt response at the single cell level. We covalently immobilized biologically active  
11 Wnt ligands to microbeads, generating a source of localized Wnt (a Wnt-bead) that can be  
12 visualized by light microscopy and tracked over time (Habib et al., 2013; Lowndes et al., 2017).  
13 We employed this approach to study the effect of localized Wnt signals on stem cells.

14 Embryonic stem cells (ESCs) are a powerful tool to investigate cell fate. ESCs are Wnt  
15 responsive (ten Berge et al., 2011) and can be seeded as single cells and retain the capacity  
16 to self-renew and differentiate to all lineages of the adult body (Martello and Smith, 2014).  
17 Additionally, recent data reveals that in ESCs, Wnt reception and the subsequent activation of  
18 the Wnt/ $\beta$ -catenin pathway act independently of receptor internalization (Rim et al., 2020). By  
19 combining the Wnt-beads with live cell imaging at high temporal resolution we observed that  
20 ESCs generate specialized membrane protrusions, termed cytonemes, that recruit localized  
21 Wnt signals. This recruitment is mediated by a crosstalk between Lrp6 and ionotropic  
22 glutamate receptor (iGluR) activity (Junyent et al., 2020). Wnt-bead recruitment initiates a  
23 polarization event involving components of the Wnt/ $\beta$ -catenin pathway, orients the mitotic  
24 spindle and leads to ACD (Habib et al., 2013; Junyent et al., 2020). This results in a Wnt-bead  
25 proximal cell that maintains high levels of pluripotency markers (e.g. Nanog, Rex1), and a  
26 Wnt-bead distal cell that progresses to a more differentiated cell fate (Habib et al., 2013).  
27 However, the molecular mechanisms underpinning this process also remained understudied.

28 Here, we combine Wnt-beads with genetic editing of ESCs to investigate the kinetics of Wnt  
29 reception. We interrogate how intrinsic components of the Wnt pathway control the cellular  
30 response to localized Wnts that leads to ACD. We used ESCs knock-out (KO) for the Wnt co-  
31 receptors Lrp5, Lrp6 and a double Lrp5/6 KO to dissect the role of the early reception complex  
32 in Wnt ligand interaction and response (Junyent et al., 2020). We also studied an inducible  $\beta$ -  
33 catenin KO ESC line that enables rapid ablation of protein without long term compensation  
34 effects (Raggioli et al., 2014) to investigate the role of the downstream effector of the Wnt/ $\beta$ -  
35 catenin pathway. Moreover, we pharmacologically inhibit the activity of iGluRs to examine how

1 crosstalk between Wnt reception and iGluRs modify the cell response to localized Wnt signals  
2 beyond initial ligand recognition.

3 Our time-series analysis resolves the dynamics of Wnt ligand recruitment by single ESCs into  
4 three stages: initial cytoneme-mediated interaction, early Wnt interaction with the cell  
5 membrane, and the subsequent effects of the Wnt-bead recruitment on spindle orientation  
6 and cell fate choice. We show that Lrp6, iGluR activity and  $\beta$ -catenin are required for the  
7 recruitment of the Wnt beads to the cell. On the other hand, KO of Lrp5 promotes cytoneme  
8 generation and facilitates Wnt-bead recruitment. Co-receptor or  $\beta$ -catenin KO, or inhibition of  
9 iGluR, restricts Wnt-bead position to the periphery of the cell. KO of Lrp5 or Lrp6 leads to  
10 increased Wnt bead movement, and ESCs lacking Lrp5 maintain Wnt-bead contact for shorter  
11 times. Upon progression to mitosis, co-receptor or  $\beta$ -catenin KO, or iGluR inhibition, impairs  
12 spindle orientation. Only Lrp5KO ESCs retain the capacity to asymmetrically partition  
13 pluripotency markers between daughter cells.

14 Altogether, our data explores how Wnt receptors,  $\beta$ -catenin and the activity of iGluRs  
15 orchestrate the dynamics of a stem cell interaction with localized Wnt signals, and how these  
16 components subsequently regulate asymmetric cell division.

17

## 1 RESULTS

### 2 The Wnt co-receptor Lrp6 regulates the prevalence and rate of cytoneme formation of 3 ESCs

4 We aimed to investigate how components of the Wnt/ $\beta$ -catenin pathway affect the cellular  
5 dynamics of ESCs and their capacity to respond to Wnt ligands. To do so, we knocked-out  
6 (KO) the co-receptors of the Wnt/ $\beta$ -catenin pathway Lrp5 (Lrp5KO), Lrp6 (Lrp6KO) and  
7 generated a double KO of both Lrp5 and 6 (Lrp5/6dKO) in mouse embryonic stem cells  
8 (ESCs), as previously described (Junyent et al., 2020) (**Fig. 1A**). We also utilized an ESC line  
9 with a conditional KO of the effector of the pathway,  $\beta$ -catenin ( $\beta$ KO), which was generated  
10 as previously described (Junyent et al., 2020; Raggioli et al., 2014). In this line, complete  $\beta$ -  
11 catenin depletion is achieved after 3-day induction with 4-hydroxytamoxifen (4-HT).

12 We validated the response of the KO cell lines to exogenous Wnt3a ligands. We used cell  
13 lines harbouring a reporter of the transcriptional co-activator activity of  $\beta$ -catenin, which  
14 express eGFP upon  $\beta$ -catenin-Tcf/Lef binding its 7xTCF promoter (Fuerer and Nusse, 2010)  
15 (**Fig. 1B**). In the presence of purified Wnt3a ligands and serum containing media, 49.06% of  
16 wild-type (WT) cells express eGFP (**Fig. 1B and C**). In the absence of Wnt3a, only a basal  
17 level of pathway activation is observed. Lrp5KO ESCs, when stimulated with Wnt3a, have a  
18 significant reduction in activation of the Wnt/ $\beta$ -catenin pathway in comparison to WT ESCs  
19 (26.66% eGFP<sup>+</sup> cells). In Lrp6KO ESCs, pathway activation is further compromised (5.60%  
20 eGFP<sup>+</sup> cells). Lrp5/6dKO ESCs cannot activate the Wnt/ $\beta$ -catenin pathway at all by soluble  
21 Wnt3a stimulation.  $\beta$ KO, which lacks  $\beta$ -catenin expression, also does not activate the pathway  
22 during Wnt3a stimulation.

23 To facilitate expansion of the cell lines, we cultured cells in 2i media (CHIR 99021,  
24 PD0325901) that maintains ESC self-renewal without the requirement for Wnt ligands or Wnt-  
25 receptor activity (Ying et al., 2008). Under these conditions, receptor KO ESCs maintain levels  
26 of pluripotency markers comparable to those of WT cells. The conditional  $\beta$ -catenin KO cell  
27 line has reduced levels of pluripotency markers after 3-day induction with 4-HT, compared to  
28 the WT cells (Junyent et al., 2020). In all proposed experiments, cell lines were cultured as  
29 single cells at low density in a serum-containing media without 2i.

30 ESCs utilize cytonemes to recruit Wnt ligands immobilized to a microbead (Wnt3a-beads)  
31 (Junyent et al., 2020). We have previously reported (Junyent et al., 2020) that at the single  
32 cell level, WT ESCs produce an average of 5 cytonemes that extend to an average maximum  
33 length of 29.9  $\mu$ m (**Fig. 1D, Movie 1**). The KO ESC lines exhibit variability in the average  
34 number of cytonemes per cell, between 4 for co-receptor KOs (**Movie 2-4**) and 7 for  $\beta$ KO  
35 (**Movie 5**). Cytoneme length is shorter in KO ESCs than in WT cells, with an average maximum

1 length of 16.3 - 23.0  $\mu\text{m}$  for coreceptor KOs, and  $\sim 20.0$  for  $\beta\text{KO}$  (**Fig 1D**). Regardless of  
2 differences in cytoneme characteristics, all ESC lines studied use cytonemes in a similar way  
3 to facilitate interaction with the surrounding environment (Junyent et al., 2020).

4 To investigate whether KO of Wnt/ $\beta$ -catenin pathway components affects the dynamics of  
5 cytoneme formation in ESCs, live imaging was performed. Single cells were seeded at low  
6 density and imaged for 12 hours. Measurement of the percentage of cells with cytonemes  
7 revealed that WT ESCs begin forming cytonemes upon substrate attachment. Within 4 hours,  
8 over 40% of WT ESCs had cytonemes (**Fig. 1E**). Interestingly, more Lrp5KO ESCs generate  
9 cytonemes than WT ESCs, reaching 55.53% in 3 hours. The rate of increase in the percentage  
10 of cells with cytonemes is similar to WT in Lrp6KO and  $\beta\text{KO}$ , with the percentage of cells with  
11 cytonemes in Lrp5/6dKO cells being slightly reduced, and plateauing marginally, but  
12 significantly, lower at 31.83%.

13 Together with cytoneme formation, cell motility provides a mechanism to encounter and  
14 interact with the local environment. To understand whether the observed changes in the  
15 cytonemes of the Wnt/ $\beta$ -catenin pathway KOs are coupled with changes to their movement,  
16 we tracked the position of the cell over time. The Mean Squared Displacement (MSD), the  
17 measure of the average cell movement per minute, revealed that cell motility in WT ESCs is  
18 minimal, with an average MSD of  $1.16 \mu\text{m}^2/\text{min}$  (**Fig. 1F**). No significant differences to WT  
19 were observed between receptor or  $\beta$ -catenin KO ESCs, with the average MSD values for  
20 each cell type falling between  $0.97$  and  $1.49 \mu\text{m}^2/\text{min}$ .

21 Altogether, we observed that intrinsic Wnt/ $\beta$ -catenin components control the generation of  
22 cytonemes, without affecting overall cellular motility. Since ESCs use cytonemes to recruit  
23 localized Wnt signals, we aimed to further investigate how different components of the Wnt/ $\beta$ -  
24 catenin pathway affect the recruitment of Wnt3a-beads to the cell membrane.

## 25 **Wnt co-receptors and iGluR activity orchestrate the interaction dynamics between** 26 **localized Wnt3a and the ESC membrane**

27 To examine the effect of Wnt/ $\beta$ -catenin pathway KOs on the capacity of ESCs to recruit  
28 localized Wnt signals, we seeded cells at low density and presented them with dispersed  
29 Wnt3a-beads. In some conditions, cells were presented with inactivated Wnt3a-beads  
30 (iWnt3a-beads), which are dithiothreitol (DTT)-treated to denature the Wnt3a protein while  
31 covalently bound to the bead. Cells were live-imaged each minute for a total of 12 hours.

32 We aimed to quantify the role of the co-receptors and  $\beta$ -catenin in the dynamics of the  
33 recruitment of localized Wnt3a to ESCs, integrating analysis at both the population and single  
34 cell level. This allowed us to quantify the capability of ESCs to form and maintain stable

1 interactions with a source of localized Wnt3a, which can impact downstream cellular  
2 responses. To do so, we combined two measurements: Firstly, the proportion of cells which  
3 were in contact with a Wnt3a-bead over time was measured every hour from the start of the  
4 imaging for 12 hours (**Fig. 2A and B**). Secondly, contact between ESC and Wnt3a-bead was  
5 measured by the duration of a single cell-bead interaction (**Fig. 2A, C and D**).

6 At the population level, when WT cells were presented with Wnt3a-beads, the proportion of  
7 cells with beads increased linearly in the first 4 hours, rising from 20.68% at the beginning of  
8 the video to 50.60%, before rising more slowly to a peak of 66.75% after 12 hours (**Fig. 2B**).  
9 ESC cytonemes are ligand-selective and can efficiently recruit localized Wnt3a signals but not  
10 iWnt3a-beads (Junyent et al., 2020). Indeed, when WT ESCs are presented with iWnt3a-  
11 beads, the percentage of cells with beads does not rise and remains less than 20% for most  
12 of the time period (**Fig. 2B**). In terms of duration of interaction with the localized Wnt3a source,  
13 WT cells were found to retain Wnt3a-beads for over 400 minutes, on average. Many cells  
14 retained Wnt3a-beads until the end of the video (12 hours, **Fig. 2C-D**). iWnt3a-beads,  
15 however, are retained for a significantly shorter time (**Fig. 2D**). In this condition, iWnt3a-beads  
16 are often dropped after a shorter period (<60 minutes), showing as a more 'fragmented' plot  
17 (**Fig. 2C**).

18 ESCs lacking Lrp6 (Lrp6KO, Lrp5/6dKO) were impaired for Wnt3a-bead accumulation, similar  
19 to WT cells with iWnt3a-beads (**Fig. 2B**). The proportion of cells with beads does not rise,  
20 remaining at approximately 30% over the course of 12 hours (**Fig. 2B**). Lrp5KO cells retain  
21 the ability to accumulate Wnt3a-beads, reaching 55.58% after 5 hours (**Fig. 2B**). Cells lacking  
22 Lrp5 (Lrp5KO, Lrp5/6dKO) maintained contact with Wnt3a-beads for a significantly shorter  
23 time, frequently losing contact after 200 minutes. The contact duration of Lrp6KO cells with  
24 Wnt3a-beads was not significantly different to WT (**Fig. 2D**).

25  $\beta$ -catenin ablation does not affect the reactivity of ESCs to a source of localized Wnt3a, when  
26 presented at a similar distance to WT cells (Junyent et al., 2020). However, similarly to  
27 Lrp6KO, cells lacking  $\beta$ -catenin ( $\beta$ KO) had significantly impaired Wnt3a-bead accumulation  
28 (**Fig. 2B**). Duration of localized Wnt3a contact, however, was not significantly different than  
29 WT (**Fig. 2C and D**).

30 A crosstalk between Lrp6 and the activity of AMPA/Kainate glutamate receptors (iGluRs)  
31 regulates the reactivity of ESC cytonemes to Wnt3a beads (Junyent et al., 2020). Here we  
32 show that pharmacological inhibition of iGluRs by cyanquinoxaline (CNQX) in WT ESCs did not  
33 affect the rate of cytoneme formation or the cell movement (**Fig. 1E and F**). However, the  
34 percentage of cells with beads was significantly lower during CNQX inhibition than untreated  
35 WT ESCs, despite similar retention time of the Wnt3a-bead (**Fig. 2B-D**).

1 Differences in the retention time and proportion of cells with Wnt3a-beads between Lrp5KO  
2 and Lrp6KO demonstrates that components of the Wnt/ $\beta$ -catenin pathway have different roles  
3 in the overall process of signal reception. Further, the differing effects of receptor or effector  
4 KOs show that stable signal recruitment is a combination of several cell-signal processes.  
5 While Lrp6,  $\beta$ -catenin, and activity of iGluRs are required for the efficient uptake and  
6 accumulation of Wnt3a-beads, Lrp5 regulates the stability of the interaction.

7 Despite these differences, it is important to note that cells of all types and in all conditions do  
8 uptake Wnt3a-beads, allowing further analysis of the interaction with localized Wnt3a. As the  
9 recruitment is the first stage of many in the process of signal reception, we aimed to investigate  
10 the dynamics of the cell-bead contact during this interaction.

### 11 **Lrp5 and Lrp6 have vital but distinct roles in the positioning and stabilization of Wnt3a** 12 **ligands on the ESC membrane**

13 The Wnt3a-bead approach provides a unique opportunity to visualize and explore the  
14 dynamics of localized Wnt on the cell membrane. Therefore, we next studied the interaction  
15 between Wnt and cells after the initial Wnt3a-bead recruitment. To do so, we measured the  
16 Wnt-bead position at every minute after initial Wnt-bead recruitment, for 3 hours. To quantify  
17 the dynamics and location of Wnt3a-bead on the ESC membrane, we measured the distance  
18 between Wnt-bead and the cell centre, and we reported it as a proportion of the cell radius  
19 (**Fig. 3A**).

20 Cells recruit Wnt-beads to the cell membrane via cytonemes, where they initially reside in the  
21 periphery. WT ESCs rapidly pull the active Wnt3a-beads from the tip of the cytoneme, first to  
22 the periphery (between 0.7 and 1.0 of the cell radius), then closer in the cell body (between  
23 0.3 and 0.7 of the cell radius). Within 1 hour, the Wnt3a-beads on average were between 0.5  
24 and 0.6 of the cell radius, indicating close contact with the central portion of the cell body (**Fig.**  
25 **3A-C**). iWnt3a-beads are recruited by WT ESCs less frequently (**Fig. 2B**) (Junyent et al.,  
26 2020). If recruited, iWnt3a-beads are also initially moved from the cytoneme tip to the  
27 periphery (0.7 to 1.0 of the cell radius). However, iWnt3a-beads are not positioned further  
28 within the cell body, reaching at closest 0.7 of the cell radius, on average (**Fig. 3A-C**).

29 ESCs lacking Lrp6 (Lrp6KO, Lrp5/6dKO) are likewise, on average, unable to recruit the  
30 Wnt3a-bead closer to the cell body (**Fig. 3B-C**). After approximately 150 minutes Lrp5KO  
31 ESCs are able to position the bead to within 0.6 of the cell radius, however this remains  
32 significantly impaired when compared to the WT cells. ESCs lacking  $\beta$ -catenin, or WT ESCs  
33 during CNQX inhibition, are also unable to maintain the bead closer than 0.7 of the cell radius  
34 (**Fig. 3B-C**).



1 KO of the receptors of the Wnt/ $\beta$ -catenin pathway, ablation of  $\beta$ -catenin, or inhibition of iGluR  
2 activity results in the significantly impaired prolonged positioning of a source of localized  
3 Wnt3a after recruitment by ESC cytoneme. Our data demonstrates differences in the  
4 positioning of the Wnt3a-bead relative to the cell, however the dynamics of the Wnt3a-cell  
5 interaction are also defined by the motion of the Wnt3a-bead relative to the cell. This led us to  
6 investigate the movement of the bead on the membrane. We calculated the MSD of the bead  
7 relative to the centre of the nucleus, for each frame of the same sequence of images as the  
8 bead position measurements (**Fig. 3D**).

9 Our analysis indicates that iWnt3a-beads held by WT ESCs have a higher rate of movement  
10 than Wnt3a-beads, with an average MSD of  $5.03 \mu\text{m}^2/\text{min}$ , compared to  $3.33 \mu\text{m}^2/\text{min}$  for  
11 Wnt3a-beads (**Fig. 3E**). The Wnt3a-beads on ESCs lacking Lrp5 (Lrp5KO), Lrp6 (Lrp6KO) or  
12 the Lrp5/6dKO have a MSD significantly higher, at  $4.71 \mu\text{m}^2/\text{min}$ ,  $4.95 \mu\text{m}^2/\text{min}$  and  $4.52$   
13  $\mu\text{m}^2/\text{min}$ , respectively. ESCs with  $\beta$ KO or CNQX inhibition have a similar rate of Wnt3a-bead  
14 movement to that of the WT control (**Fig. 3E**).

15 Altogether, our results show that WT ESCs recruit and retain Wnt3a-beads, where they are  
16 positioned further from the periphery of the cell, with limited movement. However, WT ESCs  
17 do not recruit iWnt3a-beads efficiently and have unstable interactions. ESCs position iWnt3a-  
18 beads in the periphery of the cell, where they also have more movement, and cell-bead contact  
19 is lost after a shorter on average interaction. Perturbation of the pathway components, or iGluR  
20 activity, results in impaired ability to position Wnt3a-beads close to the centre of the cell.  
21 Furthermore, while Lrp6,  $\beta$ -catenin and iGluR activity are required for the efficient recruitment  
22 of Wnt3a-beads, Lrp5 is important for retention and maintenance of the Wnt3a-bead contact.

23 We analysed the dynamics of Wnt3a-bead on the ESC membrane, and what role the pathway  
24 components have during this interaction. It is known that a Wnt3a-bead promotes orientated  
25 asymmetric cell division (ACD) in mouse ESCs (Habib et al., 2013). In order to follow the effect  
26 of bead dynamics through the process of cellular division, we studied the orientation of the  
27 spindle during mitosis.

## 28 **Wnt/ $\beta$ -catenin pathway and iGluR activity regulate the orientation of the mitotic spindle**

29 Wnt-mediated spindle orientation is known as an important factor in the process of ACD in  
30 several biological systems (Bertrand, 2016; Goldstein et al., 2006; Huang and Niehrs, 2014;  
31 Kaur et al., 2020; Sugioka et al., 2011; Walston et al., 2004). Spindle orientation is established  
32 and can be determined as early as the anaphase (Kiyomitsu and Cheeseman, 2013). Our high  
33 temporal resolution of live imaging every one minute allows accurate measurement at this  
34 time point. Anaphase can be clearly identified in brightfield by elongation of the cell along the  
35 axis of mitosis and separation of chromosomes (**Fig. 4A**). Precise measurement of the

1 direction of Wnt3a signal is achieved by direct visualization of the Wnt3a-bead. The angle  
2 between the bead, the centre of the dividing cell, and the minor axis was measured (**Fig. 4B**,  
3  $\alpha$ ). In this way, 90 degrees represents the spindle aligned directly towards the Wnt3a-bead. 0  
4 degrees represents the spindle aligned orthogonal to the bead, a misoriented division (**Fig.**  
5 **4B**).

6 WT ESCs divide predominantly oriented towards the Wnt3a-bead, with a most common angle  
7 of 85-90 degrees (**Fig. 4C**). This biased distribution is significantly different ( $p < 0.05$ ) to a  
8 randomized distribution by Chi-square statistical analysis (**Fig. 4I**). This analysis compares  
9 the experimental distribution of division angles to a randomized distribution of spindle  
10 orientations. The randomized distribution (in which the Wnt-bead contact is not having an  
11 effect) assumes a non-biased accumulation of division counts at 0°-30°, 30°-60° and 60°-90°  
12 as 1/3:1/3:1/3 of the total divisions. Indeed, when presented with iWnt3a-beads, the bias  
13 towards the bead is not seen, producing a randomized distribution. An increased proportion  
14 of cells has iWnt3a-beads between 0 and 5 degrees (**Fig. 4C and I**).

15 Single ESCs that lack Lrp5,  $\beta$ -catenin, or iGluR activity, and divide with Wnt3a-beads, result  
16 in a similarly randomized distribution ( $p > 0.05$ , Chi-square analysis), indicating a loss of Wnt-  
17 mediated spindle orientation (**Fig. 4D, G-I**). In ESCs lacking Lrp6 (Lrp6KO and Lrp5/6dKO)  
18 division contacting a Wnt3a-bead results in a misaligned orientation. Here, the distribution is  
19 significantly different from randomized distribution ( $p < 0.05$ , Chi-Square statistical analysis,  
20 **Fig. 4I**). However, the experimental angle distributions of Lrp6KO and Lrp5/6dKO are  
21 significantly different to the one measured in WT ESCs dividing with a Wnt3a-bead. This is  
22 measured by two-sample Kolmogorov-Smirnov (K-S) statistical analysis, which identifies  
23 whether two data samples arise from the same distribution (assuming non-normality). In  
24 Lrp6KO, divisions are oriented mostly between 0 and 40 degrees, and in Lrp5/6dKO, the  
25 divisions are mostly between 0 and 30 degrees (**Fig. 4E-F**). While they retain some capability  
26 to align the spindle beyond a randomized orientation, neither represent efficient Wnt3a-  
27 orientated divisions. By K-S statistical analysis, all conditions, whether by inactive iWnt3a-  
28 beads, component KO, or CNQX inhibition, are significantly different from the Wnt3a-  
29 orientated spindle seen in WT ESCs with Wnt3a-beads (**Fig. 4I**).

30 Disruption of the Wnt co-receptors, the downstream component  $\beta$ -catenin, and iGluR activity  
31 impairs the orientation of the spindle towards a source of localized Wnt3a during division.  
32 While localized Wnt3a controls spindle orientation, it also controls cell fate, producing a self-  
33 renewed Wnt3a-proximal ESC and a Wnt3a-distal prone cell to differentiation. Next we studied  
34 if the Wnt3a-spindle orientation is coupled to the cell fate determination.

## 1 **iGluR activity is required for asymmetric division of pluripotency markers, while Lrp5** 2 **is dispensable**

3 Asymmetric cell division (ACD) is the partitioning or enrichment of cellular components in one  
4 of the two daughter cells deriving from mitosis that leads to differences in the cell fate of  
5 daughter cells. We studied the role of Wnt co-receptors and  $\beta$ -catenin as well iGluR activity in  
6 this process.

7 To that end, we quantified the distribution of the pluripotency markers in post-division pairs of  
8 daughter cells in contact with Wnt3a-beads. Wnt3a-beads induces ACD in single ESCs (Habib  
9 et al., 2013). Expression of pluripotency markers allows comparison of the cell fate of the  
10 daughter cells. A higher pluripotency marker expression indicates maintenance of a naïve  
11 ESC, whereas a lower expression indicates a shift towards a more differentiated state. We  
12 seeded single cells at low density in the presence of Wnt3a-beads for 6 hours, found to be  
13 optimal for capturing cell pairs immediately after division. We then fixed, stained and analysed  
14 the divided cells, where a bead is in clear contact with only one of the two daughter cells,  
15 ensuring that cell pairs with an asymmetric presentation of the Wnt3a signal are analysed.

16 Cell pairs were categorized based on the distribution of pluripotency markers Rex1 and Nanog  
17 (**Fig. 5A and C**). If the cell in contact with the bead (Wnt3a-proximal) contains higher  
18 pluripotency marker signal, this indicates that the cell nearest the bead has self-renewed.  
19 Correspondingly, the Wnt3a-distal cell expresses significantly less pluripotency marker. This  
20 is named a 'Proximal' distribution. The corollary, where the farthest cell expresses more  
21 pluripotency marker is named a 'Distal' distribution. An even distribution, with no significant  
22 bias to either cell is named 'Distributed'. Only the proximal condition represents a Wnt-  
23 orientated asymmetric cell division.

24 When presented with Wnt3a-beads, a large proportion of wild type ESC doublets are  
25 proximally distributed, and have therefore undergone Wnt-oriented ACD (**Fig. 5B and D**). Lrp5  
26 KO ESCs lose the ability to align the spindle towards a Wnt3a signal (**Fig. 4D**). However, in  
27 Lrp5 KO ESCs that have achieved a Wnt3a-oriented division and solely one cell maintains  
28 contact with the Wnt3a-bead, they retain the capability for Wnt3a-oriented ACD (**Fig. 5B, D-**  
29 **F**). This Wnt3a-oriented ACD is no longer favoured during CNQX inhibition. While a total of  
30 ~60% of cell doublets have undergone ACD when treated with CNQX, only 30% of total  
31 doublets have a pluripotency marker distribution proximal to the localized Wnt3a (**Fig. 5B, D-**  
32 **F**).

33 ESCs lacking Lrp6 or  $\beta$ -catenin (Lrp6KO, Lrp5/6dKO,  $\beta$ KO) results in an impairment of ACD  
34 in any orientation (Proximal or Distal). This suggests that these cells are unable to  
35 compartmentalize protein constituents. The majority (53.27% to 75.34%) of these cell pairs

1 have equal pluripotency marker expression in both daughter cells. This is observed in the  
2 expression of both Rex1 and Nanog (**Fig. 5B, D-F**).

3 In summary, in ESCs Lrp5 has a role in the maintenance of contact with a localized Wnt3a  
4 source, and spindle orientation towards the Wnt3a signal. In the few Lrp5KO ESCs that do  
5 divide towards a Wnt3a-bead, Wnt3a-oriented ACD is achieved with similar efficiency to WT.  
6 Both Lrp5 and Lrp6 are involved in the stabilization of the position of Wnt3a-cell contact. Lrp6,  
7 however, plays a larger role in forming the asymmetric distribution of protein components at  
8 division, alongside  $\beta$ -catenin. Lrp6KO in ESCs results in severely impaired activation of the  
9 Wnt/ $\beta$ -catenin pathway, as well as impaired recruitment and stabilisation of interaction with  
10 Wnt3a-beads. Prior to ACD,  $\beta$ -catenin also has roles in Wnt3a recruitment and orientation of  
11 the spindle. iGluR activity functions parallel those of Lrp6 in terms of Wnt3a recruitment and  
12 the breaking of cellular symmetry.

13 We have elucidated the processes and dynamics that link initial signal interaction to the  
14 asymmetric cell division that determines differences in cell fate within a pair of daughter cells.  
15 We have determined that co-receptors of the Wnt/ $\beta$ -catenin pathway have differing roles  
16 during interaction with a localized source of Wnt3a on the cell membrane. Furthermore, we  
17 show that iGluR activity remains coupled to components of the Wnt/ $\beta$ -catenin pathway in the  
18 downstream effects of spindle orientation and ACD. This suggests that crosstalk between  
19 AMPA/Kainate receptor signalling and Lrp6 activation is not only involved in signal recognition  
20 and response, as previously shown, but is coupled throughout the spatial organisation and  
21 specification of dividing ESCs by Wnt3a.

22

23

## 1 DISCUSSION

2 Cell fate and spatial positioning occur in concert to achieve proper tissue organization. This  
3 process is often controlled by extrinsic cues such as Wnt signals. Wnt reception has been  
4 previously shown to induce cell polarization and asymmetric cell division (ACD), in an  
5 evolutionarily conserved manner (Goldstein et al., 2006; Huang and Niehrs, 2014; Mizumoto  
6 and Sawa, 2007; Ouspenskaia et al., 2016; Sugioka et al., 2011; Walston et al., 2004). Wnt  
7 signalling plays a crucial role in the stem cell niche, where stem cells receive Wnts as a cue  
8 for self-renewal and cell fate determination (Clevers et al., 2014; Garcin and Habib, 2017).  
9 Although *in vivo* lineage tracing, genetic analysis and *in vitro* studies have provided crucial  
10 understanding of the effects of Wnt on stem cell biology (Mills et al., 2017), technical limitations  
11 have impeded the study of dynamic, localized Wnt reception at the single stem cell level.  
12 Understanding these early processes of ligand recruitment to the stem cell membrane may  
13 prove beneficial for regenerative medicine and the targeting of Wnt-related diseases. By  
14 harnessing the dynamics of Wnt ligand-cell interactions, interventions focused on Wnt ligands,  
15 receptors or other signalling components on the membrane may be made more selective,  
16 targeted, and better positioned for clinically viable strategies.

17 We have developed a system for the presentation of biologically active Wnt ligands covalently  
18 immobilized to a bead (Wnt-bead) (Habib et al., 2013; Lowndes et al., 2017), allowing the  
19 direct visualization of Wnt ligands during dynamic ligand-membrane interactions. Recently, we  
20 found that ESCs generate specialized cytonemes that selectively recruit self-renewal Wnt-  
21 beads in a process that requires iGluR activity (Junyent et al., 2020). Subsequently, Wnt-  
22 beads induce oriented ACD in single ESCs (Habib et al., 2013). In this manuscript, we present  
23 a temporal analysis spanning the entire duration of the stem cell—Wnt-bead interaction: from  
24 cell morpho-motility prior to contact and initial bead recruitment through cytonemes, to  
25 dynamics during Wnt-cell membrane interaction leading to the later cellular effects on spindle  
26 orientation and ACD. Initially, we revealed differences in the pattern of cytoneme formation at  
27 the population level. ESCs under CNQX inhibition, or KO for Lrp6 or  $\beta$ -catenin, form  
28 cytonemes at the same rate as WT ESCs. They have a mostly linear increase in the proportion  
29 of cells with cytonemes over time, reaching approximately 40% within 4 hours of attachment.

30 The Wnt co-receptors Lrp5 and Lrp6 have mostly been studied in the context of  $\beta$ -catenin  
31 dependent signalling, where they are attributed to have broadly overlapping functions (He et  
32 al., 2004; Houston and Wylie, 2002; Kelly et al., 2004; Tamai et al., 2000; Wehrli et al., 2000),  
33 albeit to different levels of efficiency (Holmen et al., 2002; MacDonald et al., 2011). Our unique  
34 system demonstrates differing roles between Lrp5 and Lrp6. The endogenous expression of  
35 Lrp6 alone in ESCs (in Lrp5KO) results in an increased rate of cytoneme formation over WT

1 ESCs, reaching 55.53% of cells with cytonemes after 3 hours. Together with a reduction in  
2 the rate of cytoneme formation in Lrp5/6dKO, this suggests that Lrp6 has a distinct role in the  
3 regulation of the cytoskeleton. Both Lrp5 and Lrp6 contain proline rich motifs (XPPPP) in the  
4 cytoplasmic domain that can bind to regulators of actin filaments responsible for changes to  
5 their elongation and dynamics (Brown et al., 1998; Krause et al., 2003; Lian et al., 2016; Zhu  
6 et al., 2012). Lrp6 binds Filamin A (FlnA), an anchor of transmembrane proteins to, and  
7 regulator of, the actin cytoskeleton (Lian et al., 2016). Despite 69% sequence identity overall  
8 between Lrp5 and Lrp6 (MacDonald et al., 2011), the corresponding region in Lrp5 has 37%  
9 identity. Such differences might contribute to differential roles in the organization of the actin  
10 cytoskeleton, and interaction with the machinery required for cytoneme formation/elongation.  
11 We suggest that Lrp5 may be acting in competition with Lrp6 for the interaction of Wnt-pathway  
12 components or cytoskeletal regulators. Hence, upon Lrp5 KO, this competition may be lifted,  
13 resulting in improved Lrp6-cytoskeleton interaction and the increased rate of cytoneme  
14 formation and initial Wnt3a-bead recruitment observed in Lrp5KO ESCs.

15 The rate of Wnt-bead accumulation by KO cells is also affected. During the early interaction,  
16 WT ESCs use cytonemes to recruit and retain Wnt3a-beads efficiently, reaching 66.75% of  
17 cells with beads after 12 hours, positioning them near the centre of the cell with limited  
18 movement. WT ESCs are unable to recruit iWnt3a-beads with the same efficiency: ESCs  
19 maintain iWnt3a-beads nearer the periphery of the cell, and their interactions are shorter and  
20 less stable. KO of pathway components Lrp5, Lrp6 or  $\beta$ -catenin, or inhibition of iGluRs, also  
21 reduces the ability to position a Wnt3a-bead on the membrane near the centre of the cell.  
22 While Lrp6,  $\beta$ -catenin and iGluR activity play an important role in the recruitment of Wnt3a-  
23 beads, Lrp5 is important for the stabilization of the Wnt-cell interaction both in space and over  
24 time.

25 The control of positioning of the Wnt3a-bead in WT ESCs may facilitate efficient protein  
26 interactions required for signal transduction, enhancing downstream pathway activation.  
27 Beyond the ligand-receptor binding, Wnt-pathway component polarization (Capelluto et al.,  
28 2002) and oligomerization (Cong et al., 2004) are suggested to play roles in the enhancement  
29 or modulation of Wnt signaling (Bilic et al., 2007). Here, the spatial stabilization and  
30 colocalization of upstream and downstream pathway components at a 'signalling hub' may be  
31 critical for efficient signal transmission. Membrane receptors, including glutamate receptors  
32 (Yang et al., 2006), have been demonstrated to flow from membrane protrusion towards the  
33 centre of the cell. This motion can be promoted by directed movement of the actin cytoskeleton  
34 (Hanley, 2014; Yu et al., 2010) and its efficiency can be governed by the activation of the  
35 pathway (Hartman et al., 2009). Areas of relative membrane concavity, such as the cell centre  
36 away from the periphery, have also been shown to enhance membrane receptor interactions

1 with intracellular components (Rangamani et al., 2013). This process may be required for the  
2 enhancement, or maximization, of signalling transmission (Schmick and Bastiaens, 2014).

3 Following early Wnt-bead recruitment and upon progression to mitosis, WT ESCs orientate  
4 the spindle towards the source of localized Wnt3a at anaphase. Perturbation of the Wnt/ $\beta$ -  
5 catenin pathway components or iGluR activity inhibition resulted in significant impairment of  
6 the alignment of the spindle to localized Wnt3a. Furthermore, an asymmetric presentation of  
7 Wnt3a at division leads to the asymmetric distribution of pluripotency markers in the dividing  
8 WT ESCs. The Wnt-proximal cell retains the majority of pluripotency marker expression in  
9 these doublets, indicating self-renewal, while the Wnt-distal cell has a more differentiated fate.  
10 Asymmetric cell division is impaired when the ESCs lack Lrp6,  $\beta$ -catenin or iGluR activity. Lrp5  
11 KO ESCs remain able to asymmetrically segregate pluripotency markers to the proximal cell.  
12 This data suggests a differential requirement for Lrp6 and Lrp5 in ACD, which is also  $\beta$ -catenin  
13 dependent, as corroborated by severe impairment of ACD in  $\beta$ KO.

14 Our study also distinguishes  $\beta$ -catenin dependent and independent processes in early Wnt  
15 ligand-receptor interaction and cellular outcomes. Wnt-recruitment, Wnt-positioning, spindle  
16 orientation, and ACD, while requiring the activity of Wnt co-receptors and iGluRs, are  $\beta$ -catenin  
17 dependent. The rate of cytoneme formation, cell motility, and localized Wnt-retention,  
18 however, appear to be  $\beta$ -catenin independent, despite involvement of Wnt co-receptors  
19 Lrp5/6. We previously found that  $\beta$ -catenin had an inverse relationship with the number of  
20 cytonemes in ESCs (Junyent et al., 2020). Furthermore, while individual interactions of  
21 cytoneme and Wnt3a-bead were equally efficient in WT and  $\beta$ KO ESCs (Junyent et al., 2020),  
22 here we demonstrate that the population-level accumulation of Wnt3a-beads is severely  
23 attenuated. Our results in the  $\beta$ -catenin and co-receptor KOs blur the lines between canonical  
24 and non-canonical Wnt pathways, instead suggesting an integrated, complex response to  
25 localized Wnt reception that affects stem cell biology in multiple aspects.

26 iGluR activity, and its crosstalk with the Wnt/ $\beta$ -catenin pathway, controls recruitment of Wnt  
27 signals in ESCs. Surprisingly, we found that iGluR activity is further involved in many of the  
28 subsequent processes of Wnt-interaction. At the population level, iGluR inhibition reduces the  
29 accumulation of Wnt3a-bead, despite having no significant effect on the rate cytoneme  
30 formation or cell motility. iGluR activity is shown to have a major role in the dynamics of Wnt  
31 on the membrane, spindle orientation, and to an extent, the Wnt3a-mediated determination of  
32 cell fate. We propose that crosstalk between the activity of iGluRs and Lrp6 controls the  
33 prolonged coupling of the two pathways, resulting in highly overlapping effects of Lrp6 or iGluR  
34 perturbation.

1 As many stem cells express glutamatergic receptors (Skerry and Genever, 2001) and rely on  
2 Wnts for their self-renewal (Clevers et al., 2014), investigation of equivalent effects in the  
3 biology of adult stem cells is required. Our results suggest a crosstalk between iGluRs and  
4 Wnt-pathway activity in ESCs that affects cell and signal kinetics throughout Wnt signal  
5 recruitment and the cellular outcome of oriented ACD. The iGluR-Wnt pathway crosstalk may  
6 therefore prove to be a pervasive mechanism in the coordination throughout cell fate  
7 determination and tissue patterning in many cell types and biological systems.

8

9



## 1 MATERIALS AND METHODS

### 2 Cell culture

3 Wild-type W4 (129S6/SvEvTac) mouse ESCs or ESCs knock-out for Lrp5, Lrp6 or Lrp5/6dKO  
4 (Junyent et al., 2020) were maintained in ESC basal media containing Advanced DMEM/F12  
5 (cat. num. 12634028, Life Technologies), 10% ESC-qualified fetal bovine serum (eFBS, cat.  
6 num. ES-009-B, Millipore), 1% penicillin-streptomycin (P-S, cat. num. P4333, Sigma), 2 mM  
7 Glutamax (cat. num. 35050061, Life Technologies), 50  $\mu$ M  $\beta$ -mercaptoethanol (2ME, cat. num.  
8 21985-023, Gibco) and 1000 U/mL recombinant Leukemia Inhibitory Factor (LIF; cat. num.  
9 130-095-775, Miltenyi), supplemented with with 2i: MEK inhibitor PD0325901 (1  $\mu$ M, cat. num.  
10 130-104-170, Miltenyi) and GSK3 inhibitor CHIR99021 (3  $\mu$ M, cat. num. 130-104-172,  
11 Miltenyi). Heterozygous  $\beta$ -catenin deficient ( $\beta^{fl}$ ) ESCs, with an inducible floxed  $\beta$ -catenin  
12 allele, and stably carrying a Cre-ER-T2 cassette under the control of a chicken  $\beta$ -actin  
13 promoter (Raggioli et al., 2014) were cultured in the same conditions. Media was changed  
14 daily, and cells were grown at low density until formation of mid-sized colonies before  
15 passaging (every 3-4 days). To passage ESCs, colonies were rinsed with PBS, trypsinised,  
16 neutralized and centrifuged at 1.2 x g for 4 minutes. Pelleted cells were resuspended in ESC  
17 basal media and counted to obtain 7,000 cells/well and transferred to a clean tissue culture-  
18 treated 6-well plate. In some experiments, 24 hours prior to use, 2i was withdrawn and  
19 replaced with soluble Wnt3a protein (200 ng/mL).

20 Generation of inducible  $\beta$ -catenin knock-out from  $\beta^{fl}$  cells was achieved through the addition  
21 of 0.1  $\mu$ g/mL 4-hydroxy-tamoxifen (4-HT) (cat. num. H6278, Sigma) to the media every 24  
22 hours for 72 hours (referred as  $\beta$ KO in the text).

23 All cell lines were maintained at 37°C, 5%CO<sub>2</sub> and were routinely tested for mycoplasma  
24 infection.

### 25 Preparation of Wnt3a-microbeads

26 Recombinant Wnt3a proteins were produced as described before (Habib et al., 2013; Junyent  
27 et al., 2020), or purchased (cat. num. 1324-WN, R&D systems). Wnt3a proteins were  
28 immobilized to 2.8  $\mu$ m carboxylic acid coated Dynabeads® (cat. num. 14305D,  
29 ThermoFisher), as described before (Habib et al., 2013; Junyent et al., 2020; Lowndes et al.,  
30 2017). Briefly, the carboxylic acid groups on the Dynabeads® were activated by 30-minute  
31 incubation with carbodiimide (cat. num. E7750-1G, Sigma) and N-hydroxyl succinamide (cat.  
32 num. 56480-25G, Sigma) (50 mg/mL each, dissolved in 25 mM cold 2-(N-morpholino)  
33 ethanesulfonic acid (MES) (cat. num. M3671-50G, Sigma) buffer (pH5) with constant rotation.  
34 Following activation, beads were retained by using a magnet and washed three times with 25

1 mM MES buffer (pH5). Soluble Wnt3a protein (500 ng) was diluted 1:5 in MES buffer (pH5)  
2 and incubated with the beads for 1 hour with constant agitation, at room temperature (RT).  
3 Beads were washed again three times with PBS (pH 7.4) before storage in media containing  
4 10% FBS at 4°C. Inactivation of Wnt3a beads was achieved through incubation with 10 mM  
5 Dithiothreitol (DTT; Life Technologies, #P2325) for 30 minutes at 37°C. Following incubation  
6 with DTT, beads were washed three times in PBS before storage in media containing 10%  
7 FBS at 4°C (up to 10 days). Bead activity was validated as described before (Habib et al.,  
8 2013; Junyent et al., 2020; Lowndes et al., 2017)

#### 9 Live-cell imaging and image analysis and spindle orientation

10 ESCs were seeded at 2,500 cells per well of a clear-bottomed black 96 well plate in complete  
11 media containing LIF (no 2i). 0.3 µg Wnt3a-beads were added per well. The 96 well plate was  
12 placed into the Zeiss inverted Axio Imager epifluorescence microscope, equipped with a  
13 CoolSNAP HQ2 CCD camera. Cells were allowed to settle in the microscope at 37°C, 5% CO<sub>2</sub>  
14 for 30 minutes prior to imaging. Between 20-30 positions were selected, and cells were imaged  
15 at 10X (N/A = 0.3) in brightfield every 1 minute for 12-15 hours.

16 The resulting videos were analysed to measure the percentage of cells with cytonemes, the  
17 percentage of cells with beads and the bead retention time in all conditions. “Manual tracking”  
18 tool in Fiji (ImageJ) was used to measure the Wnt-bead position, the cell-centre position and  
19 the radius of the cell every minute for 180 minutes (3h) after bead recruitment through a  
20 cytoneme. The resulting data was used to measure cell movement, position of the Wnt bead  
21 on top of the cell and Wnt bead movement, normalized to cell movement.

22 Cells dividing in contact with a Wnt3a-bead were measured to analyse spindle orientation.  
23 The “Angle” tool in Fiji (ImageJ) was used to measure the angle between the minor axis and  
24 the Wnt-bead position at the same point in anaphase for all conditions (**Fig. 4A and B**).

#### 25 Immunofluorescence and measurement of asymmetric cell division

26 ESCs were seeded at 3,000 cells/well + 0.3 µg Wnt3a-bead/well onto human fibronectin (10  
27 µg/mL, cat. um. 7340101, VWR/SLS) coated 8-well slides (cat. num. 80828, Thistle Scientific)  
28 in complete media containing LIF (no 2i). Slides were incubated for 7h at 37°C, 5%CO<sub>2</sub>. After  
29 incubation, media was pipetted out and cells were fixed with 4%PFA for 8 min at room  
30 temperature (RT). Cells were then washed 3 times in staining buffer (Phosphate buffered  
31 saline (PBS, cat. num. d8537, Sigma), with 0.1% Bovine Serum Albumin (cat. num. A8806,  
32 Sigma), 0.05% Sodium Azide and 0.001% Tween20 (cat. num. P2287, Sigma)) for 5 minutes  
33 each. Slides were incubated in primary antibody diluted in staining buffer at 4°C overnight.  
34 Then, slides were carefully washed 3 times for 5 minutes in staining buffer and incubated with

1 AlexaFluor-conjugated secondary antibodies (Life Technologies) diluted in staining buffer, for  
2 1h at RT. Final washes were performed with staining buffer containing Hoecht 33342 (cat.  
3 num. H3570, Life Technologies) at 1:2000 dilution. Slides were carefully mounted with  
4 ProLong mounting media (cat. num. P10144, Life Technologies) and curated for 24-48h before  
5 imaging. Slides were imaged on a Zeiss inverted Axio Imager epifluorescence microscope  
6 using Zen 2 (Blue edition) software, 40x (NA = 1.3), equipped with a CoolSNAP HQ2 CCD  
7 camera. Z-stacks were taken according to the optimal interval, and the range obtained based  
8 on  $\beta$ -catenin signal. Images were processed, deconvolved, and quantified by supervised  
9 quantification using Volocity software (Perkin Elmer).

10 Supervised quantification involved reconstructing the cell using fluorescence staining and  
11 manual identification of divided cells. The cell proximal to the bead was defined as the region  
12 of interest (ROI), and the distal cell was defined as the fluorescence minus the proximal cell  
13 (ROI). Cells were compartmentalized based on DAPI staining for nucleus and the remainder  
14 of the cell minus DAPI comprised the cytoplasmic region. Protein distribution in the doublets  
15 was established as follow: Proximal, >55% of protein in bead-proximal cell; Distributed, 55%  
16 to 45% of protein in bead-proximal cell; Distal, <45% of protein in bead-proximal cell.

#### 17 Live cell holotomographic microscopy

18 Holotomographic images were obtained by using 3D Cell Explorer (Nanolive) microscope  
19 equipped with a 60x (N.A. 0.8) lens. Images were analysed using STEVE® software  
20 (Nanolive) and Fiji (ImageJ).

#### 21 Fluorescence Activated Cell Sorting

22 Fluorescence activated cell sorting (FACS) was employed to detect Wnt3a response of WT or  
23 KO ESCs stably infected with 7xTCF-eGFP//SV40-mCherry (Junyent et al., 2020). Infected  
24 cells were sorted to gain a pure mCherry+ population. Following stimulation with Wnt3a or  
25 control media (ESC basal media) for 24h, cells were harvested using 0.25% trypsin-EDTA  
26 solution, filtered and analyzed using the FACSFortessa system (BD Biosciences). The gating  
27 strategy included gating for SSC-FSC, SSC-A-SSC-W, SSC-DAPI (alive cells), SSC-PE  
28 Texas Red (mCherry+ cells), and SSC-FITC (eGFP+ cells). Cells were prepared for FACS  
29 and analysis was performed as described before. Analysis was performed using FlowJo  
30 software (FlowJo).

#### 31 Statistical analysis

32 Data representation and statistical analysis were performed using Prism (GraphPad), as  
33 described in the figures. ANOVA (one- or two-way) analysis, followed by Tukey's multiple  
34 comparisons test was performed to compare data between conditions. For analysis of spindle

1 orientation, the Kolmogorov-Smirnov statistical test was performed to compare between  
2 conditions of non-normally distributed data and Chi-square analysis was performed to  
3 compare between observed data and the expected/randomized distribution. The statistical  
4 analysis used for each assay is described in the figure legends. In all experiments, biological  
5 replicates (n) for each assay comprise of experiments performed independently from one  
6 another, and as such are from different cultured populations/passages of cells, different  
7 sessions of imaging/measurement, and independent media/reagent/cell dilution. Sample sizes  
8 (N) were selected such that the power of the statistical analysis performed was sufficient, in  
9 accordance with previous studies (Habib et al., 2013; Junyent et al., 2020). Outliers were  
10 considered as individual data points significantly outside the range of possible/meaningful  
11 values for each assay and were excluded from subsequent analysis. For all figures, symbols  
12 indicate statistical significance as follows: \* $p < 0.05$ , \*\* $p < 0.01$ , \*\*\* $p < 0.001$ , \*\*\*\* $p < 0.0001$ .  
13 Non-significance was set as  $p > 0.05$ . All numerical source data, as well as statistical analysis  
14 results including 95% confidence interval and adjusted  $p$ -values can be consulted in the  
15 source data file for each figure.

16

17

18

19

20

## 1    **ACKNOWLEDGEMENTS**

2    We acknowledge financial support from the Department of Health via the National Institute for  
3    Health Research (NIHR) Comprehensive Biomedical Research Centre award to the Guy's &  
4    St Thomas National Health Service Foundation Trust in partnership with King's College  
5    London and the King's College Hospital NHS Foundation Trust. This work was supported by  
6    a Sir Henry Dale Fellowship (102513/Z/13/Z) to S.J.H.

7

## 8    **CONTRIBUTION**

9    S.J., J.R. and S.J.H. designed the study, performed experiments and analysed data, wrote  
10   the manuscript and prepared figures. J.L.A.S, C.L.G and T-J.T. performed experiments and  
11   analysed data. M.W. analysed data. S.J.H lead the project and provided financial support for  
12   the project.

13

## 14   **COMPETING INTERESTS**

15   No competing interests.

16

## 17   **REFERENCES**

18   Akong K, McCartney BM, Peifer M. 2002. Drosophila APC2 and APC1 have overlapping  
19   roles in the larval brain despite their distinct intracellular localizations. *Dev Biol* **250**:71–  
20   90. doi:10.1006/dbio.2002.0777

21   Bahmanyar S, Kaplan DD, DeLuca JG, Giddings TH, O'Toole ET, Winey M, Salmon ED,  
22   Casey PJ, Nelson WJ, Barth AIM. 2008.  $\beta$ -catenin is a Nek2 substrate involved in  
23   centrosome separation. *Genes Dev* **22**:91–105. doi:10.1101/gad.1596308

24   Bertrand V. 2016. B-Catenin-Driven Binary Cell Fate Decisions in Animal Development.  
25   *Wiley Interdiscip Rev Dev Biol* **5**:377–388. doi:10.1002/wdev.228

26   Bienz. 2005.  $\beta$ -Catenin: A Pivot between Cell Adhesion and Wnt Signalling Mutual. *Curr Biol*  
27   **15**:64–67. doi:10.1016/j.cub.2004.12.058

28   Bilic J, Huang Y-L, Davidson G, Zimmermann T, Cruciat C-M, Bienz M, Niehrs C. 2007. Wnt  
29   Induces LRP6 Signalosomes and Promotes Dishevelled-Dependent LRP6  
30   Phosphorylation. *Science (80- )* **316**:1619–1622. doi:10.1126/science.1137065

- 1 Brown SD, Twells RCJ, Hey PJ, Cox RD, Levy ER, Soderman AR, Metzker ML, Caskey CT,  
2 Todd JA, Hess JF. 1998. Isolation and characterization of LRP6, a novel member of the  
3 low density lipoprotein receptor gene family. *Biochem Biophys Res Commun* **248**:879–  
4 888. doi:10.1006/bbrc.1998.9061
- 5 Capelluto DGS, Kutateladze TG, Habas R, Finkielstein C V., He X, Overduin M. 2002. The  
6 DIX domain targets dishevelled to actin stress fibres and vesicular membranes. *Nature*  
7 **419**:726–729. doi:10.1038/nature01056
- 8 Clevers H. 2006. Wnt/ $\beta$ -Catenin Signaling in Development and Disease. *Cell* **127**:469–480.  
9 doi:10.1016/j.cell.2006.10.018
- 10 Clevers H, Loh KM, Nusse R. 2014. Stem cell signaling. An integral program for tissue  
11 renewal and regeneration: Wnt signaling and stem cell control. *Science* **346**:1248012.  
12 doi:10.1126/science.1248012
- 13 Cong F, Schweizer L, Varmus H. 2004. Wnt signals across the plasma membrane to  
14 activate the  $\beta$ -catenin pathway by forming oligomers containing its receptors, Frizzled  
15 and LRP. *Development* **131**:5103–5115. doi:10.1242/dev.01318
- 16 Davidson G, Shen J, Huang YL, Su Y, Karaulanov E, Bartscherer K, Hassler C, Stanek P,  
17 Boutros M, Niehrs C. 2009. Cell Cycle Control of Wnt Receptor Activation. *Dev Cell*  
18 **17**:788–799. doi:10.1016/j.devcel.2009.11.006
- 19 Fuerer C, Nusse R. 2010. Lentiviral vectors to probe and manipulate the Wnt signaling  
20 pathway. *PLoS One* **5**. doi:10.1371/journal.pone.0009370
- 21 Garcin CL, Habib SJ. 2017. A Comparative Perspective on Wnt /  $\beta$  -Catenin Signalling in  
22 Cell Fate Determination In: J.-P. Tassan JZK, editor. *Asymmetric Cell Division in*  
23 *Development, Differentiation and Cancer, Results and Problems in Cell Differentiation*  
24 *61*, DOI 10.1007/978-3-319-53150-2\_15. Springer International Publishing AG. pp.  
25 323–350. doi:10.1007/978-3-319-53150-2
- 26 Goldstein B, Takeshita H, Mizumoto K, Sawa H. 2006. Wnt signals can function as positional  
27 cues in establishing cell polarity. *Dev Cell* **10**:391–6. doi:10.1016/j.devcel.2005.12.016
- 28 Habib SJ, Chen B-C, Tsai F-C, Anastassiadis K, Meyer T, Betzig E, Nusse R. 2013. A  
29 Localized Wnt Signal Orients Asymmetric Stem Cell Division in Vitro. *Science (80-*  
30 **339**:1445–1448. doi:10.1126/science.1231077
- 31 Hanley JG. 2014. Actin-dependent mechanisms in AMPA receptor trafficking. *Front Cell*  
32 *Neurosci* **8**:1–8. doi:10.3389/fncel.2014.00381

- 1 Hartman NC, Nye JA, Groves JT. 2009. Cluster size regulates protein sorting in the  
2 immunological synapse. *Proc Natl Acad Sci U S A* **106**:12729–12734.  
3 doi:10.1073/pnas.0902621106
- 4 He X, Semenov M, Tamai K, Zeng X. 2004. LDL receptor-related proteins 5 and 6 in Wnt/ $\beta$ -  
5 catenin signaling: Arrows point the way. *Development* **131**:1663–1677.  
6 doi:10.1242/dev.01117
- 7 Hendriksen J, Jansen M, Brown CM, van der Velde H, van Ham M, Galjart N, Offerhaus GJ,  
8 Fagotto F, Fornerod M. 2008. Plasma membrane recruitment of dephosphorylated  $\beta$ -  
9 catenin upon activation of the Wnt pathway. *J Cell Sci* **121**:1793–1802.  
10 doi:10.1242/jcs.025536
- 11 Holmen SL, Salic A, Zylstra CR, Kirschner MW, Williams BO. 2002. A novel set of Wnt-  
12 Frizzled fusion proteins identifies receptor components that activate  $\beta$ -catenin-  
13 dependent signaling. *J Biol Chem* **277**:34727–34735. doi:10.1074/jbc.M204989200
- 14 Houston DW, Wylie C. 2002. Cloning and expression of *Xenopus* Lrp5 and Lrp6 genes.  
15 *Mech Dev* **117**:337–342. doi:10.1016/S0925-4773(02)00205-8
- 16 Huang P, Senga T, Hamaguchi M. 2007. A novel role of phospho- $\beta$ -catenin in microtubule  
17 regrowth at centrosome. *Oncogene* **26**:4357–4371. doi:10.1038/sj.onc.1210217
- 18 Huang YL, Niehrs C. 2014. Polarized Wnt signaling regulates ectodermal cell fate in  
19 *Xenopus*. *Dev Cell* **29**:250–257. doi:10.1016/j.devcel.2014.03.015
- 20 James RG, Conrad WH, Moon RT. 2008. *b-Catenin-Independent Wnt Pathways: Signals,*  
21 *Core Proteins, and Effectors, Wnt Signaling, Volume I: Pathway Methods and*  
22 *Mammalian Models.* doi:10.1007/978-1-59745-249-6
- 23 Junyent S, Garcin CL, Szczerkowski JLA, Trieu T-J, Reeves J, Habib SJ. 2020. Specialized  
24 cytonemes induce self-organization of stem cells. *Proc Natl Acad Sci* **117**:7236–7244.  
25 doi:10.1073/pnas.1920837117
- 26 Kaur S, Méléneć P, Murgan S, Bordet G, Recouvreux P, Lenne P-F, Bertrand V. 2020. Wnt  
27 ligands regulate the asymmetric divisions of neuronal progenitors in *C. elegans*  
28 embryos. *Development* dev.183186. doi:10.1242/dev.183186
- 29 Kelly OG, Pinson KI, Skarnes WC. 2004. The Wnt co-receptors Lrp5 and Lrp6 are essential  
30 for gastrulation in mice. *Development* **131**:2803–2815. doi:10.1242/dev.01137
- 31 Kikuchi K, Niikura Y, Kitagawa K, Kikuchi A. 2010. Dishevelled, a Wnt signalling component,  
32 is involved in mitotic progression in cooperation with Plk1. *EMBO J* **29**:3470–83.

- 1           doi:10.1038/emboj.2010.221
- 2   Kiyomitsu T, Cheeseman IM. 2013. XCortical dynein and asymmetric membrane elongation  
3           coordinate the position of the spindle in anaphase. *Cell* **154**:391.  
4           doi:10.1016/j.cell.2013.06.010
- 5   Komiya Y, Habas R. 2008. Wnt signal transduction pathways. *Organogenesis* **4**:68–75.  
6           doi:10.4161/org.4.2.5851
- 7   Krause M, Dent EW, Bear JE, Loureiro JJ, Gertler FB. 2003. Ena/VASP Proteins: Regulators  
8           of the Actin Cytoskeleton and Cell Migration. *Annu Rev Cell Dev Biol* **19**:541–564.  
9           doi:10.1146/annurev.cellbio.19.050103.103356
- 10   Langton PF, Kakugawa S, Vincent J-P. 2016. Making, Exporting, and Modulating Wnts.  
11           *Trends Cell Biol* **26**:756–765. doi:10.1016/j.tcb.2016.05.011
- 12   Lian G, Dettenhofer M, Lu J, Downing M, Chenn A, Wong T, Sheen V. 2016. Filamin A- and  
13           formin 2-dependent endocytosis regulates proliferation via the canonical wnt pathway.  
14           *Dev* **143**:4509–4520. doi:10.1242/dev.139295
- 15   Lowndes M, Junyent S, Habib SJ. 2017. Constructing cellular niche properties by localized  
16           presentation of Wnt proteins on synthetic surfaces. *Nat Protoc* **12**:1498–1512.  
17           doi:10.1038/nprot.2017.061
- 18   MacDonald BT, Semenov M V., Huang H, He X. 2011. Dissecting molecular differences  
19           between Wnt coreceptors LRP5 and LRP6. *PLoS One* **6**.  
20           doi:10.1371/journal.pone.0023537
- 21   Martello G, Smith A. 2014. The nature of embryonic stem cells. *Annu Rev Cell Dev Biol*  
22           **30**:647–675. doi:10.1146/annurev-cellbio-100913-013116
- 23   McCartney BM, Dierick HA, Kirkpatrick C, Moline MM, Baas A, Peifer M, Bejsovec A. 1999.  
24           Drosophila APC2 is a cytoskeletally-associated protein that regulates wingless  
25           signaling in the embryonic epidermis. *J Cell Biol* **146**:1303–1318.  
26           doi:10.1083/jcb.146.6.1303
- 27   Mills KM, Szczerkowski JLA, Habib SJ. 2017. Wnt ligand presentation and reception : from  
28           the stem cell niche to tissue engineering.
- 29   Mizumoto K, Sawa H. 2007. Cortical  $\beta$ -Catenin and APC Regulate Asymmetric Nuclear  $\beta$ -  
30           Catenin Localization during Asymmetric Cell Division in *C. elegans*. *Dev Cell* **12**:287–  
31           299. doi:10.1016/j.devcel.2007.01.004
- 32   Niehrs C, Acebron SP. 2012. Mitotic and mitogenic Wnt signalling. *EMBO J* **31**:2705–2713.



- 1           doi:10.1038/emboj.2012.124
- 2   Nusse R, Clevers H. 2017. Wnt/ $\beta$ -Catenin Signaling, Disease, and Emerging Therapeutic  
3           Modalities. *Cell* **169**:985–999. doi:10.1016/j.cell.2017.05.016
- 4   Ouspenskaia T, Matos I, Mertz AF, Fiore VF, Fuchs E. 2016. WNT-SHH Antagonism  
5           Specifies and Expands Stem Cells prior to Niche Formation. *Cell* **164**:156–169.  
6           doi:10.1016/j.cell.2015.11.058
- 7   Raggioli A, Junghans D, Rudloff S, Kemler R. 2014. Beta-Catenin Is Vital for the Integrity of  
8           Mouse Embryonic Stem Cells. *PLoS One* **9**:e86691. doi:10.1371/journal.pone.0086691
- 9   Rangamani P, Lipshtat A, Azeloglu EU, Calizo RC, Hu M, Ghassemi S, Hone J, Scarlata S,  
10           Neves SR, Iyengar R. 2013. XDecoding Information in Cell Shape. *Cell* **154**:1356.  
11           doi:10.1016/j.cell.2013.08.026
- 12   Rim EY, Kinney LK, Nusse R. 2020. Beta-catenin-mediated Wnt signal transduction  
13           proceeds through an endocytosis-independent mechanism. *Mol Biol Cell* mbc.E20-02-  
14           0114. doi:10.1091/mbc.E20-02-0114
- 15   Salinas PC. 2007. Modulation of the microtubule cytoskeleton: a role for a divergent  
16           canonical Wnt pathway. *Trends Cell Biol* **17**:333–342. doi:10.1016/j.tcb.2007.07.003
- 17   Schmick M, Bastiaens PIH. 2014. The interdependence of membrane shape and cellular  
18           signal processing. *Cell* **156**:1132–1138. doi:10.1016/j.cell.2014.02.007
- 19   Sedgwick AE, D’Souza-Schorey C. 2016. Wnt signaling in cell motility and invasion: Drawing  
20           parallels between development and cancer. *Cancers (Basel)* **8**:1–15.  
21           doi:10.3390/cancers8090080
- 22   Skerry TM, Genever PG. 2001. Glutamate signalling in non-neuronal tissues. *Trends*  
23           *Pharmacol Sci* **22**:174–181. doi:10.1016/S0165-6147(00)01642-4
- 24   Stamatakou E, Hoyos-Flight M, Salinas PC. 2015. Wnt signalling promotes actin dynamics  
25           during axon remodelling through the actin-binding protein Eps8. *PLoS One* **10**:1–19.  
26           doi:10.1371/journal.pone.0134976
- 27   Stanganello E, Zahavi EE, Burute M, Smits J, Jordens I, Maurice MM, Kapitein LC,  
28           Hoogenraad CC. 2019. Wnt Signaling Directs Neuronal Polarity and Axonal Growth.  
29           *iScience* **13**:318–327. doi:10.1016/j.isci.2019.02.029
- 30   Sugioka K, Mizumoto K, Sawa H. 2011. Wnt regulates spindle asymmetry to generate  
31           asymmetric nuclear  $\beta$ -catenin in *C. elegans*. *Cell* **146**:942–954.  
32           doi:10.1016/j.cell.2011.07.043

- 1 Tahinci E, Thorne CA, Franklin JL, Salic A, Christian KM, Lee LA, Coffey RJ, Lee E. 2007.  
2 Lrp6 is required for convergent extension during *Xenopus* gastrulation. *Development*  
3 **134**:4095–4106. doi:10.1242/dev.010272
- 4 Takada R, Satomi Y, Kurata T, Ueno N, Norioka S, Kondoh H, Takao T, Takada S. 2006.  
5 Monounsaturated Fatty Acid Modification of Wnt Protein: Its Role in Wnt Secretion. *Dev*  
6 *Cell* **11**:791–801. doi:10.1016/j.devcel.2006.10.003
- 7 Tamai K, Semenov M, Kato Y, Spokony R, Liu C, Katsuyama Y, Hess F, Saint-Jeannet JP,  
8 He X. 2000. LDL-receptor-related proteins in Wnt signal transduction. *Nature* **407**:530–  
9 535. doi:10.1038/35035117
- 10 ten Berge D, Kurek D, Blauwkamp T, Koole W, Maas A, Eroglu E, Siu RK, Nusse R. 2011.  
11 Embryonic stem cells require Wnt proteins to prevent differentiation to epiblast stem  
12 cells. *Nat Cell Biol* **13**:1070–5. doi:10.1038/ncb2314
- 13 Walston T, Tuskey C, Edgar L, Hawkins N, Ellis G, Bowerman B, Wood W, Hardin J. 2004.  
14 Multiple Wnt signaling pathways converge to orient the mitotic spindle in early *C.*  
15 *elegans* embryos. *Dev Cell* **7**:831–841. doi:10.1016/j.devcel.2004.10.008
- 16 Wehrli M, Dougan ST, Caldwell K, O’Keefe L, Schwartz S, Valzel-Ohayon D, Schejter E,  
17 Tomlinson A, DiNardo S. 2000. Arrow encodes an LDL-receptor-related protein  
18 essential for Wingless signalling. *Nature* **407**:527–530. doi:10.1038/35035110
- 19 Willert K, Brown JD, Danenberg E, Duncan AW, Weissman IL, Reya T, Yates JR, Nusse R.  
20 2003. Wnt proteins are lipid-modified and can act as stem cell growth factors. *Nature*  
21 **423**:448–452. doi:10.1038/nature01611
- 22 Willert K, Nusse R. 2012. Wnt proteins. *Cold Spring Harb Perspect Biol* **4**:1–14.  
23 doi:10.1101/cshperspect.a007864
- 24 Yang G, Huang A, Zhu S, Xiong W. 2006. It is time to move: Role of lateral diffusion in  
25 AMPA receptor trafficking. *J Neurosci* **26**:9082–9083. doi:10.1523/JNEUROSCI.3018-  
26 06.2006
- 27 Ying Q-L, Wray J, Nichols J, Batlle-Morera L, Doble B, Woodgett J, Cohen P, Smith A. 2008.  
28 The ground state of embryonic stem cell self-renewal. *Nature* **453**:519–523.  
29 doi:10.1038/nature06968
- 30 Yu C han, Wu HJ, Kaizuka Y, Vale RD, Groves JT. 2010. Altered actin centripetal retrograde  
31 flow in physically restricted immunological synapses. *PLoS One* **5**:1–9.  
32 doi:10.1371/journal.pone.0011878

- 1 Zhu Y, Tian Y, Du J, Hu Z, Yang L, Liu J, Gu L. 2012. Dvl2-dependent activation of Daam1
- 2 and RhoA regulates Wnt5a-induced breast cancer cell migration. *PLoS One* 7.
- 3 doi:10.1371/journal.pone.0037823

4

5

## 1 FIGURES AND FIGURE LEGENDS

### Figure 1

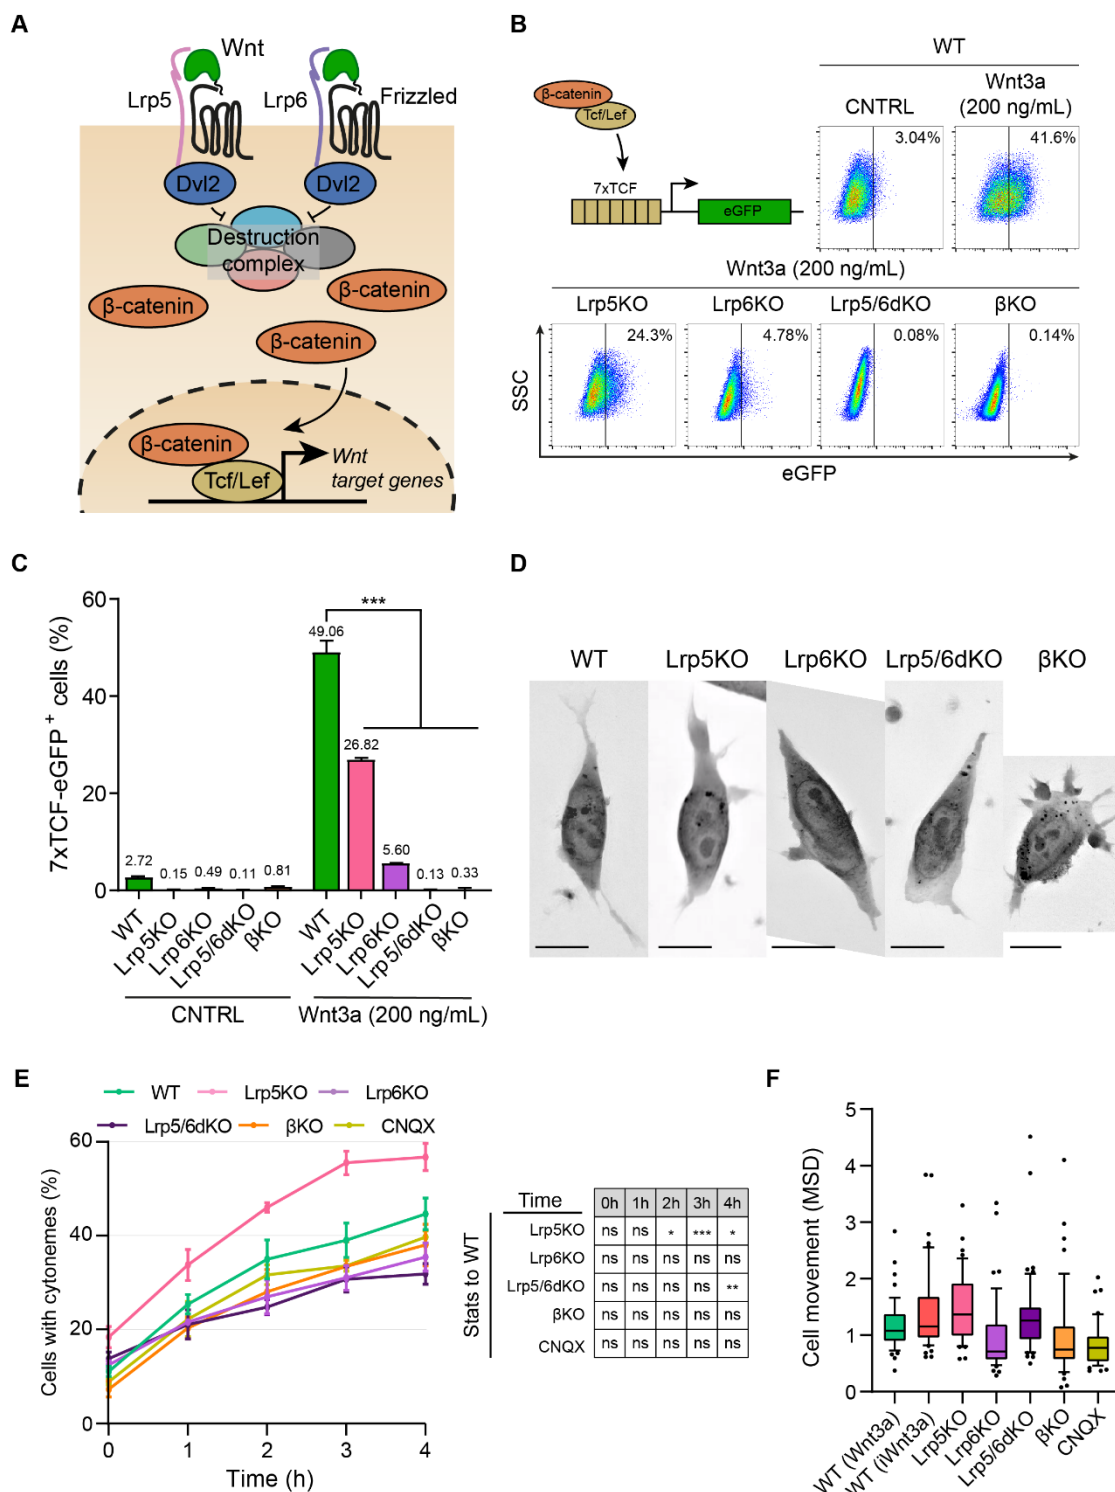

2

3 **FIGURE 1. The requirements of components of the Wnt/β-catenin for Wnt**  
 4 **responsiveness and cytoneme formation.**

- 1 **A.** Schematic and simplified representation of the Wnt/ $\beta$ -catenin pathway. Wnt binding to the  
2 receptor Frizzled and the co-receptors Lrp5 and Lrp6 induces the inhibition of the  $\beta$ -catenin  
3 destruction complex (Axin2, Gsk3, Ck1, APC) through Dvl2.  $\beta$ -catenin is stabilized and  
4 translocated to the nucleus, where it binds Tcf/Lef to initiate the transcription of Wnt target  
5 genes.
- 6 **B.** (*Top left*) Schematic representation of the 7xTCF-eGFP Wnt/ $\beta$ -catenin reporter. (*Top right*  
7 and *Bottom*) Representative dot-plots depicting the levels of eGFP expression in WT or Wnt  
8 pathway KO ESCs carrying the 7xTCF-eGFP reporter and treated with CNTRL solution or 200  
9 ng/mL soluble Wnt3a for 24h. Y axis is SSC.
- 10 **C.** Quantification of the percentage of 7xTCF-eGFP<sup>+</sup> cells, as described in **B**.  $n \geq 3$ . Bar is  
11 mean, error bars indicate SEM. Stars indicate statistical significance calculated by two-way  
12 ANOVA with Tukey multiple comparison tests, as follows: \*\*\* $p < 0.001$ .
- 13 **D.** Representative images of the protrusions generated by WT or Wnt pathway KO ESCs,  
14 imaged by holographic-tomographic 3D microscopy. Scale bars, 20  $\mu$ m.
- 15 **E.** Quantification of the percentage of WT ESCs, Wnt pathway KO ESCs, or WT ESCs treated  
16 with 10  $\mu$ M CNQX, with cytonemes at 0 to 4 hours after seeding. Line is centred on mean,  
17 error bars indicate SEM.  $n \geq 3$ ,  $N \geq 30$  cells per timepoint and per  $n$ . Stars in box (*right*) indicate  
18 statistical significance to WT, calculated by two-way ANOVA with Tukey multiple comparison  
19 tests, as follows: ns (*non-significant*,  $p > 0.05$ ) \* $p < 0.05$ , \*\* $p < 0.01$ , \*\*\* $p < 0.001$ .
- 20 **F.** Quantification of cell movement, presented as mean squared displacement (MSD), for WT  
21 ESCs co-cultured with Wnt3a-beads or iWnt3a-beads, Wnt pathway KO ESCs co-cultured  
22 with Wnt3a-beads, or WT ESCs treated with 10  $\mu$ M CNQX and co-cultured with Wnt3a-beads.  
23 Cells were tracked for 3h after protrusion generation. Box represents median and quartiles,  
24 error bars represent 10-90 percentile, dots are data outside 10-90 percentile range. Data is  
25 pooled from  $n \geq 3$  experiments,  $N \geq 50$  cells each. Statistical non-significance to WT condition  
26 was verified by one-way ANOVA with Tukey multiple comparison test.
- 27

## Figure 2

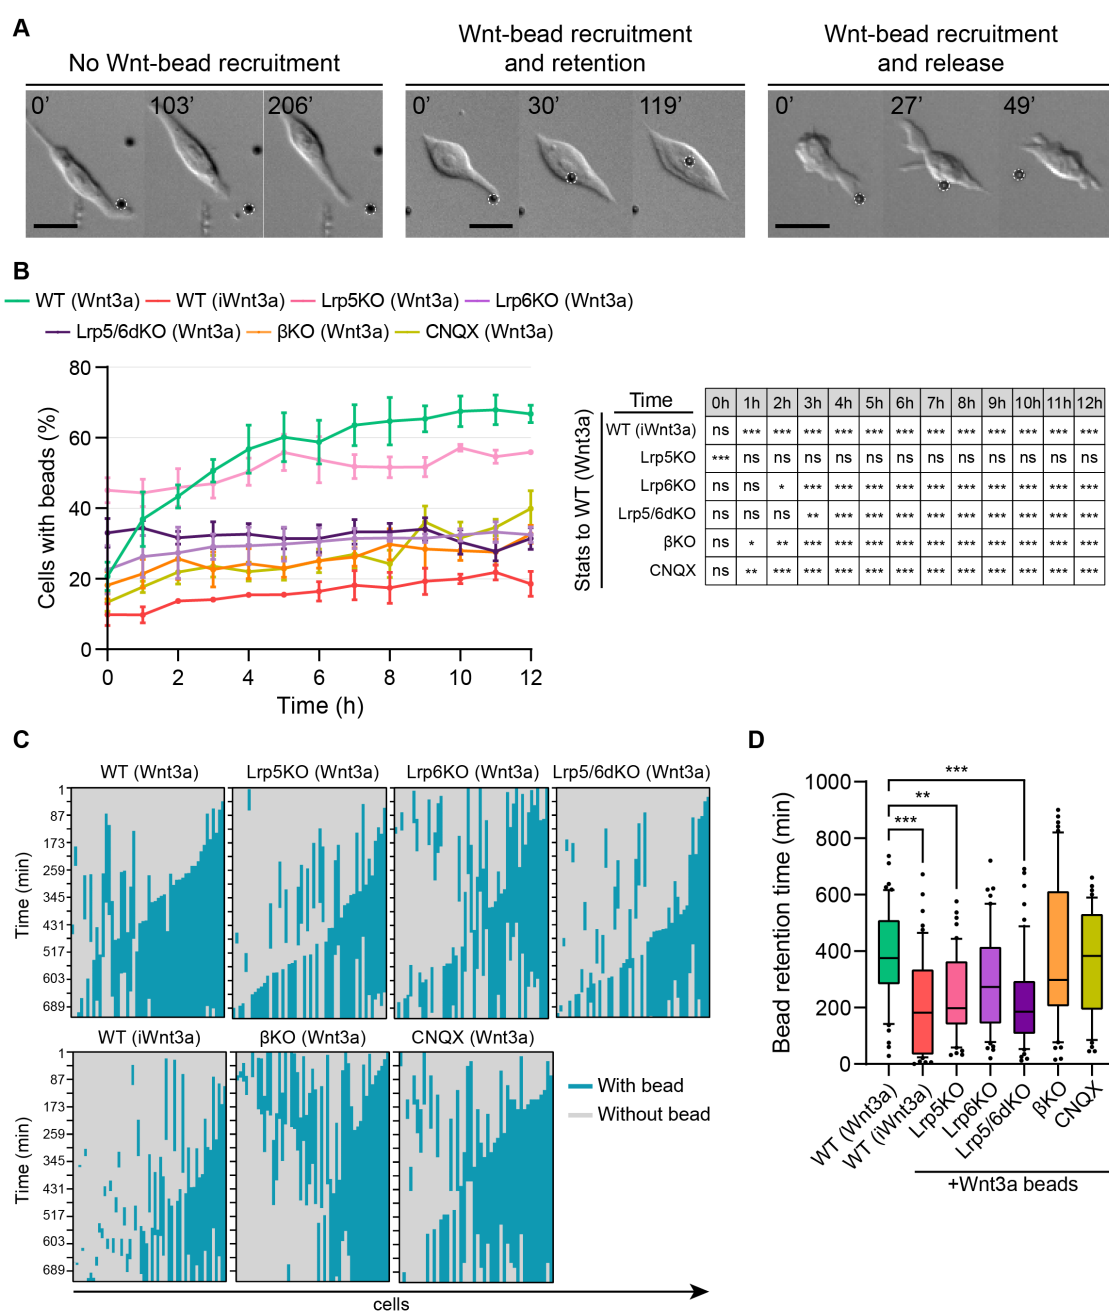

1

2 **FIGURE 2. Wnt co-receptors and iGluR activity orchestrate the interaction dynamics**  
 3 **between localized Wnt3a and the ESC membrane**

4 **A.** Representative frames of time-course live imaging displaying an ESC contacting a Wnt-  
 5 bead without further recruitment (*left*), an ESC contacting a Wnt-bead, recruiting it and  
 6 retaining it at the membrane for a long period (*middle*), or an ESC recruiting a Wnt-bead and  
 7 releasing it (*right*). Scale bars, 20  $\mu$ m. Wnt-beads are highlighted by white dashed circle. Time  
 8 is minutes.

1 **B.** Quantification of the percentage of WT ESCs, Wnt pathway KO ESCs, or WT ESCs treated  
2 with 10  $\mu$ M CNQX, contacting Wnt3a-beads or inactive Wnt3a-beads (iWnt3a) at 0 to 12 hours  
3 after seeding. Line is centred on mean, error bars are SEM.  $n \geq 3$ ,  $N \geq 40$  cells per timepoint  
4 and per n. Stars in box (*right*) indicate statistical significance to WT with Wnt3a-beads,  
5 calculated by two-way ANOVA with Tukey multiple comparison test, as follows: ns (*non-*  
6 *significant*,  $p > 0.05$ ),  $*p < 0.05$ ,  $**p < 0.01$ ,  $***p < 0.001$ .

7 **C.** Graphical representation of the bead retention time in WT ESCs, Wnt pathway KO ESCs,  
8 or WT ESCs treated with 10  $\mu$ M CNQX, contacting Wnt3a-beads or WT ESCs contacting  
9 iWnt3a-beads.  $N = 50$  cells/condition are presented as columns. Grey colour indicates cell  
10 without beads, Blue colour indicates cell with beads. Time is displayed in the y axis, expressed  
11 in minutes.

12 **D.** Quantification of the Wnt-bead retention time for cells displayed in **C**. Box indicates median  
13 and quartiles, error bars indicate 10-90 percentile, dots are data out of range. Data is pooled  
14 approximately evenly from  $n \geq 3$  independent experiments, total  $N = 50$  cells/condition. Stars  
15 indicate statistical significance to WT ESCs contacting Wnt3a-beads, calculated by two-way  
16 ANOVA with Tukey multiple comparison tests, as follows:  $**p < 0.01$ ,  $***p < 0.001$ .

17

## Figure 3

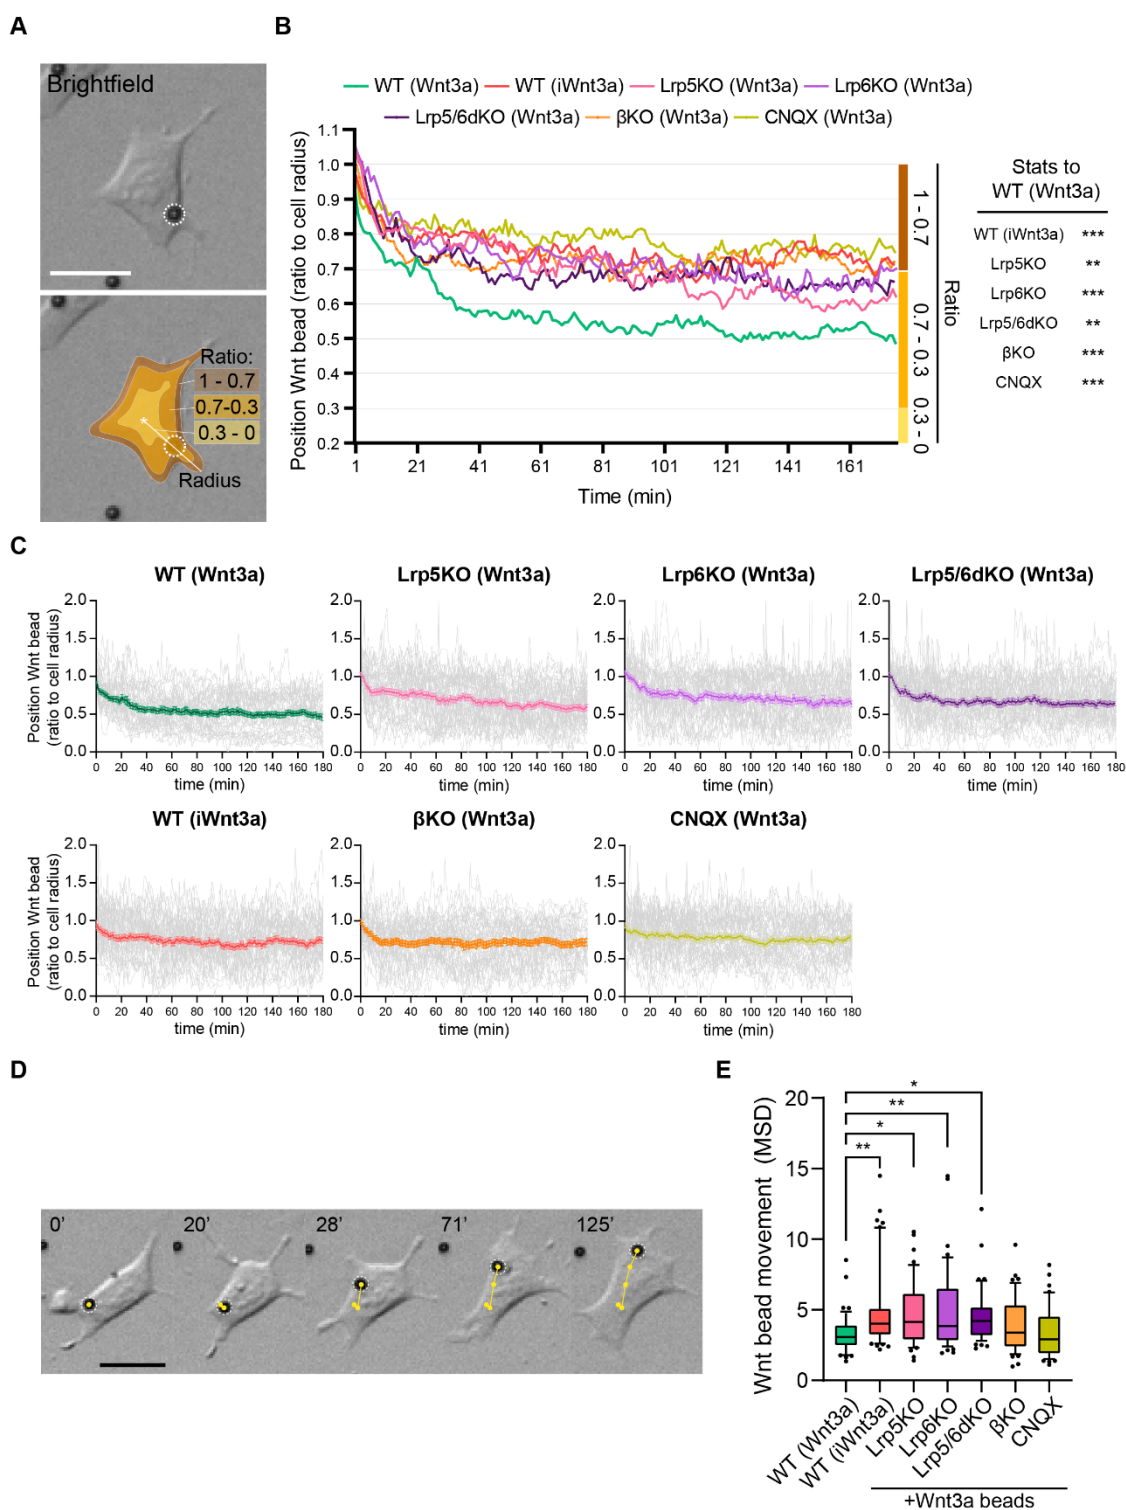

1

2 **FIGURE 3. Wnt co-receptors and iGluR control Wnt-bead movement and positioning at**  
 3 **the membrane**

4 **A.** Representative brightfield image of an ESC contacting a Wnt3a-bead (*top*). Schematic  
 5 representation of “membrane” area (1-0.7 ratio of radius, brown), “middle of cell” area (0.7-0.3



1 ratio of radius, orange) or “top of cell” area (0.3-0 ratio of radius, yellow), and of the radius  
2 used to calculate the areas (white line) (*bottom*). Scale bar, 20  $\mu\text{m}$ .

3 **B.** Quantification of Wnt-bead position in the cell, displayed as ratio to cell radius, and  
4 measured every minute for 3 hours (180 minutes) after initial Wnt-bead recruitment. Lines are  
5 mean per condition. *Right* axis indicates cellular areas, as described in **A**.  $N = 50$  total  
6 cells/condition, pooled approximately evenly from  $n \geq 3$  experiments. Stars indicate statistical  
7 significance across time average to WT ESCs contacting Wnt3a-beads, calculated by one-  
8 way ANOVA with Tukey multiple comparison test, as follows:  $**p < 0.01$ ,  $***p < 0.001$ .

9 **C.** Quantification of Wnt-bead position in the cell, displayed as ratio to cell radius, and  
10 measured every minute for 3 hours (180 minutes) after initial Wnt-bead recruitment, as  
11 summarised in **B**. Coloured lines are mean, grey lines are individual cell tracks, error bars =  
12 SEM.  $N = 50$  total cells/condition, pooled approximately evenly from  $n \geq 3$  experiments.

13 **D.** Representative frames of time-course live imaging, displaying an ESC contacting a Wnt  
14 bead. Wnt-bead is highlighted with white dashed circle. Yellow track indicates Wnt-beads  
15 movement on the cell over time. Scale bar, 20  $\mu\text{m}$ . Time is minutes.

16 **E.** Quantification of Wnt-bead movement on the cell, presented as MSD. Bead movement was  
17 measured every minute for 3h (180 min) after recruitment in WT ESCs contacting Wnt3a- or  
18 iWnt3a-beads, in Wnt pathway KO ESCs contacting Wnt3a-beads or in WT ESCs treated with  
19 10  $\mu\text{M}$  CNQX contacting Wnt3a-beads. Box indicates median and quartiles, error bars indicate  
20 10-90 percentile, dots are data outside 10-90 percentile range.  $N =$  total 50 cells/condition,  
21 pooled approximately evenly from  $n \geq 3$  experiments. Stars indicate statistical significance  
22 calculated by one-way ANOVA with Tukey multiple comparison, as follows:  $*p < 0.05$ ,  $**p < 0.01$ .

23

## Figure 4

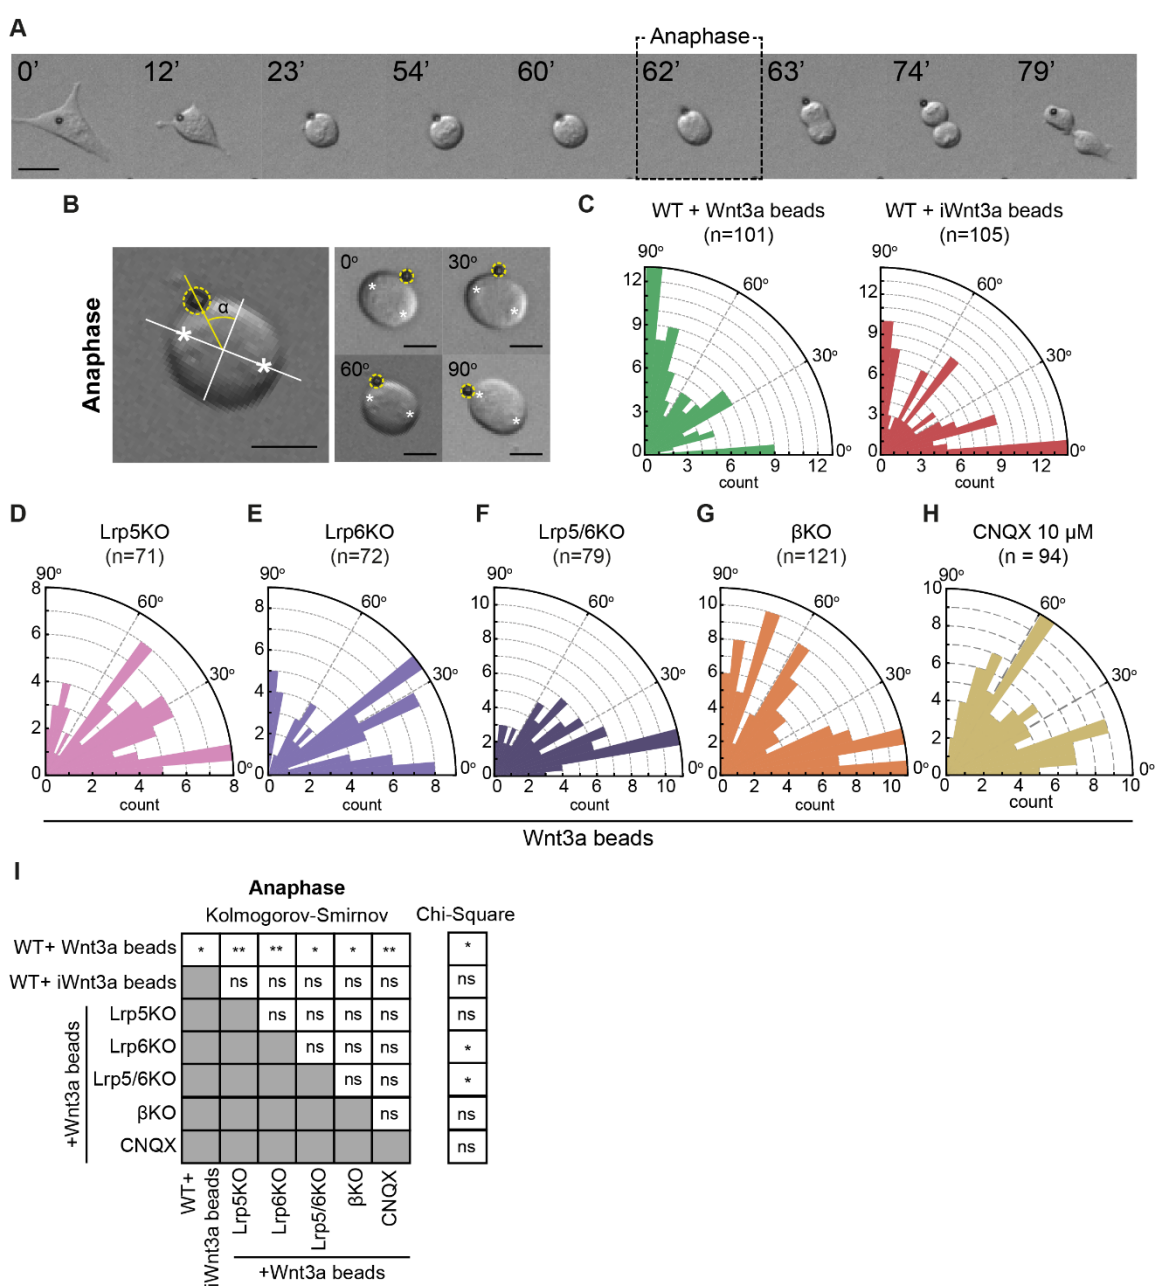

1

2 **FIGURE 4. Wnt/ $\beta$ -catenin pathway and iGluR activity regulate the orientation of the**  
 3 **mitotic spindle**

4 **A.** Representative frames of a time-course live imaging, displaying an ESCs contacting a Wnt-  
 5 bead and undergoing an oriented division. Wnt-bead is black sphere. Scale bar, 20  $\mu$ m. Time  
 6 is minutes. Dashed box indicates the “Anaphase” timepoint used for spindle orientation  
 7 analysis.

8 **B.** (Left) Representative image of the method used for spindle angle measurement relative to  
 9 Wnt-bead position. Asterisks indicate cell poles used as reference for the measurement.

1 Orthogonal white lines depict major and minor axis, yellow line points to Wnt-bead and limits  
2 the angle measured ( $\alpha$ ). Wnt-bead is highlighted with yellow dashed circle. (*Right*)  
3 Representative images of ESCs dividing with Wnt-beads at different angles (indicated in the  
4 figure). Scale bars, 10  $\mu$ m.

5 **C.** Rose-plots depicting the spindle angle at anaphase relative to Wnt-bead in WT ESCs  
6 contacting Wnt3a-beads (*left*, green) or iWnt3a-beads (*right*, red). Number of cells ( $n$ ) is  
7 displayed in the figure, pooled approximately evenly from  $n \geq 3$  experiments.

8 **D – H.** Rose-plots depicting the spindle angle at anaphase in Lrp5KO (**D**, pink), Lrp6KO (**E**,  
9 purple), Lrp5/6dKO (**F**, dark purple),  $\beta$ KO (**G**, orange) contacting Wnt3a-beads or WT ESCs  
10 treated with 10  $\mu$ M CNQX contacting Wnt3a-beads (**H**, yellow). Number of cells ( $n$ ) is displayed  
11 in the figure, pooled approximately evenly from  $n \geq 3$  experiments.

12 **I.** Statistical comparison of spindle angles between all conditions, at anaphase. (*Left*)  
13 Kolmogorov-Smirnov comparison of angle distribution between conditions. (*Right*) Chi-  
14 squared comparison of the angles of each condition to a random ( $n/3$ :  $n/3$ :  $n/3$  for  $0^\circ$ - $30^\circ$ :  $30^\circ$ -  
15  $60^\circ$ :  $60^\circ$ - $90^\circ$ ) distribution. Stars indicate statistical significance, as follows: ns (*non-significant*,  
16  $p > 0.05$ ), \* $p < 0.05$ , \*\* $p < 0.01$ .

17

## Figure 5

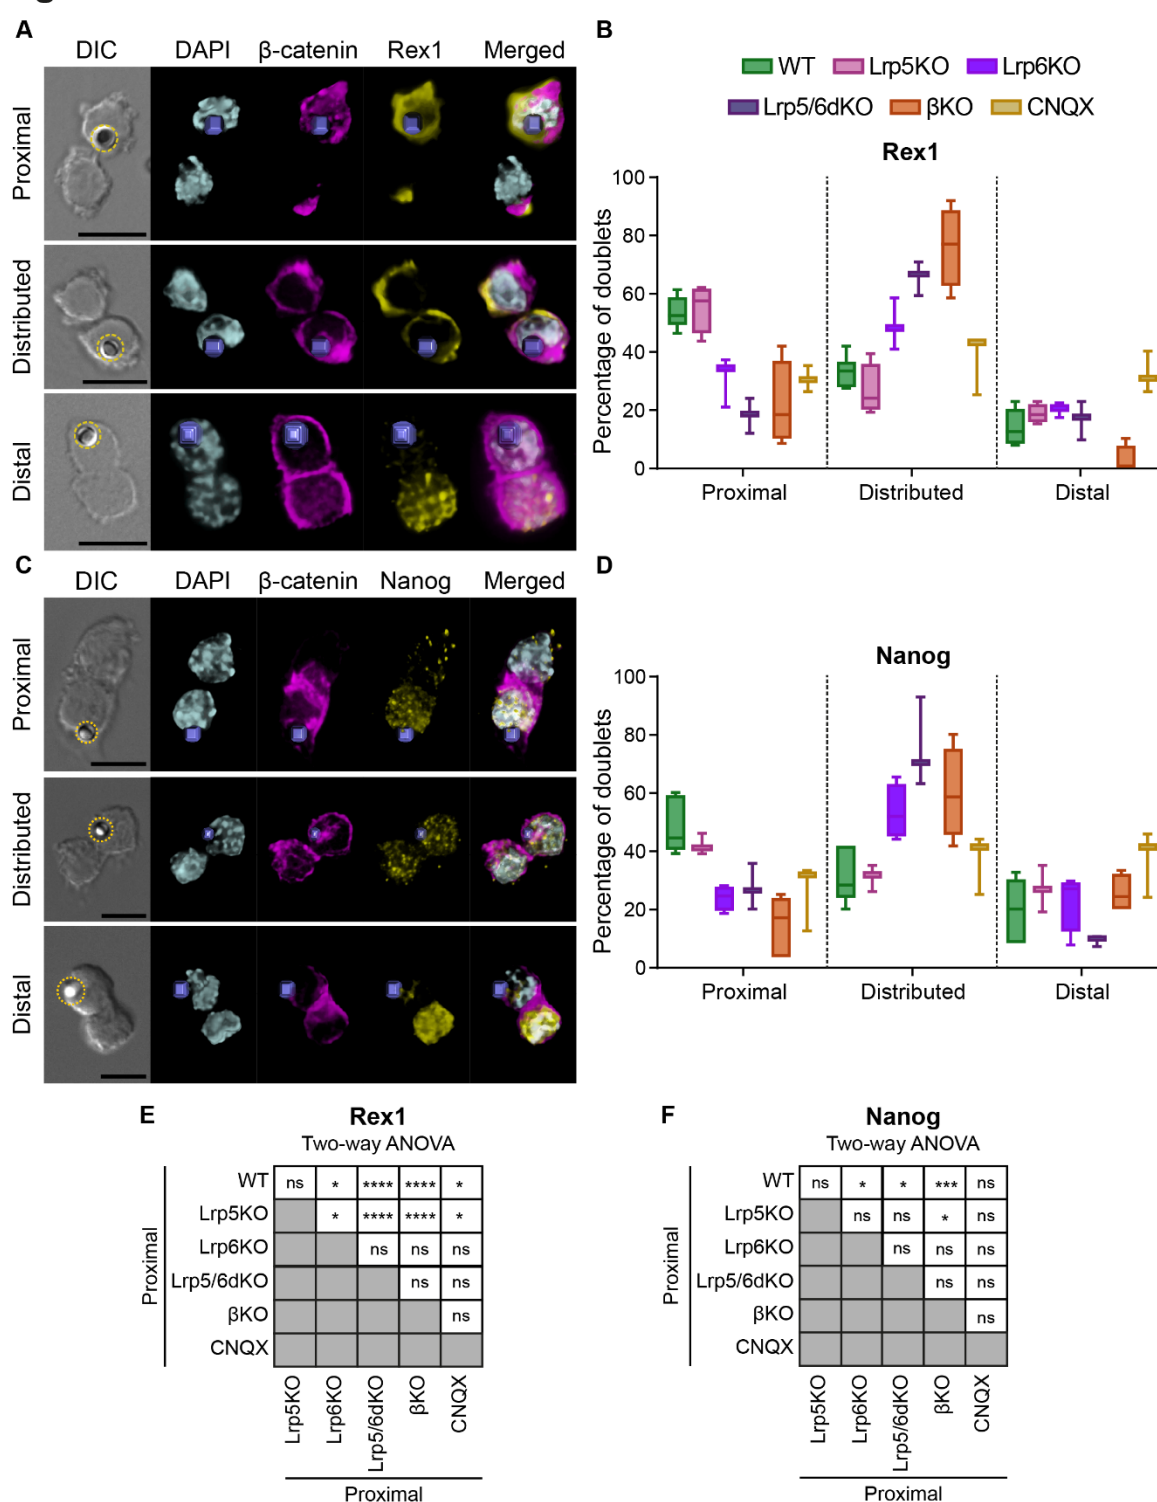

1

2 **FIGURE 5. β-catenin and Lrp6 and iGluR activity are required for Wnt-mediated**  
 3 **asymmetric cellular division**

4 **A and C.** Representative images of ESC doublets after dividing in contact with a Wnt3a-bead,  
 5 labelled with antibodies against β-catenin (magenta), Rex1 (**A**, yellow), Nanog (**C**, yellow) or  
 6 4',6-diamidino-2-phenylindole (DAPI, cyan). Images are 3D renderings of mathematically

1 deconvolved raw fluorescent images. DIC is Differential Interference Contrast. Panels display  
2 doublets with higher marker expression in the Wnt-bead contacting cell (*Top*, Proximal), with  
3 distributed levels of expression between cells (*Middle*, Distributed) or with higher marker  
4 expression in the cell not contacting a Wnt-bead (*Bottom*, Distal). Wnt-bead is highlighted by  
5 yellow dashed circle in DIC or reconstructed as purple box in fluorescence images. Scale bars  
6 are 20  $\mu\text{m}$ .

7 **B and D.** Quantification of the percentage of doublets displaying Proximal, Distributed or Distal  
8 Rex1 (**B**) or Nanog (**D**) distribution.  $n \geq 3$ , each with  $N \geq 20$  doublets. Box indicates median  
9 and quartiles, error bars indicate 10-90 percentile.

10 **E and F.** Statistical comparison of proximally dividing cells amongst conditions, calculated by  
11 two-way ANOVA with Tukey multiple comparison test. Stars indicate statistical significance as  
12 follows: ns (*non-significant*,  $p > 0.05$ ),  $*p < 0.05$ ,  $**p < 0.01$ ,  $***p < 0.001$ ,  $****p < 0.0001$ .

13

14

15

1    **CAPTIONS FOR SUPPLEMENTARY MOVIES**

2    **Movie 1. Protrusions of WT ESCs.** High-quality phase images of WT ESCs generating  
3    protrusions. Images were obtained by 3D holotomographic microscopy. Scale bar, 20  $\mu\text{m}$ .

4    **Movie 2. Protrusions of Lrp5KO ESCs.** High-quality phase images of Lrp5KO ESCs  
5    generating protrusions. Images were obtained by 3D holotomographic microscopy. Scale bar,  
6    20  $\mu\text{m}$ .

7    **Movie 3. Protrusions of Lrp6KO ESCs.** High-quality phase images of Lrp6KO ESCs  
8    generating protrusions. Images were obtained by 3D holotomographic microscopy. Scale bar,  
9    20  $\mu\text{m}$ .

10   **Movie 4. Protrusions of Lrp5/6dKO ESCs.** High-quality phase images of Lrp5/6dKO ESCs  
11   generating protrusions. Images were obtained by 3D holotomographic microscopy. Scale bar,  
12   20  $\mu\text{m}$ .

13   **Movie 5. Protrusions of  $\beta$ KO ESCs.** High-quality phase images of  $\beta$ KO ESCs generating  
14   protrusions. Images were obtained by 3D holotomographic microscopy. Scale bar, 20  $\mu\text{m}$ .

15

16

17
